# Supplementary material
Source: PubMed Central journal article supplement (PMC3436190)
Supplement: supp_M112.378901_jbc.M112.378901-1.pdf [file supp_M112.378901_jbc.M112.378901-1.pdf]

## SUPPLEMENTARY MATERIALS AND METHODS:

*Generation of conditional Ada3 knockout targeting construct*-To generate a conditional targeting construct, we examined the genomic structure of the mouse Ada3 gene. According to the NCBI mouse genome resources (Build 32.1), mouse Ada3 gene is located on chromosome 6, is composed of 9 exons and spans approximately 11kb. We flanked exons 2 to 4 with loxP sequences so that these exons can be removed from the chromosome using Cre-dependent recombination. Exons 2 to 4 were targeted based on the following considerations. Targeting of these three exons will lead to deletion of 188 amino acids amounting to about 43% of protein coding sequence and the transcript from the remaining exons is unlikely to lead to a functional protein product. Limiting the gene manipulation to exons 2 to 4 also minimized potential effects on promoter/enhancer elements of neighboring genes ([http://www.ncbi.nlm.nih.gov/entrez/query.fcgi?db=gene&cmd=Retrieve&dopt=Graphics&list\\_uids=70601](http://www.ncbi.nlm.nih.gov/entrez/query.fcgi?db=gene&cmd=Retrieve&dopt=Graphics&list_uids=70601)). We used a probe from Ada3 genomic region to screen a BAC library (RPCI-22 (129S6/SvEvTac) (Children's Hospital Oakland Research Institute, bacpac.chori.org) and identified a clone that had the required genomic region of Ada3 locus to generate a targeting construct. LoxP sites were introduced using a recombineering technique, as previously described (1).

*Generation of Ada3 gene-targeted mice and isolation of mouse embryos and PCR genotyping*-A duplex-PCR based strategy was developed to distinguish between the wild-type and Ada3 mutant alleles. The primers are as follows: a, 5'-CGGGAGGGGGAGCTCTATGAATCCTGATCTAT-3'; b, 5'-TCAACATAATTTCTCTGTATAACAACCTCTGGC-3'; c, 5'-CAATATGACTAACTACATCTCTGG-3' (Supplementary Figure S1A). A 470-bp fragment indicates the presence of the wild type allele, whereas a 703-bp fragment is amplified from the mutated allele. For analysis of post implantation embryos, *Ada3*<sup>+/-</sup> females were sacrificed at various time points (see Table 1) after being mated to *Ada3*<sup>+/-</sup> males. Embryos were dissected from the uteri and washed in phosphate-buffered saline (PBS), and DNA was isolated after proteinase K (Roche) digestion. Genotyping was performed by a duplex PCR using the duplex-PCR mentioned above. For blastocyst isolation, plugged *Ada3*<sup>+/-</sup> females were euthanized at 3.5 dpc, and their uteri were dissected and flushed with DMEM. Blastocysts were either directly genotyped or seeded singly onto 24-well plates and cultured in complete DMEM at 37°C with 5% CO<sub>2</sub>. After 4 days, the medium was changed, and after 7 days in culture, blastocyst DNA was isolated and subjected to genotyping PCR

*Generation of Ada3 monoclonal antibody and Immunoblotting*-Full length human Ada3 cDNA was cloned into pGEX 6P1 bacterial expression vector (that contain N-terminal GST tag followed by a precision protein). The recombinant protein (hAda3) was purified from a large scale culture of BL21 *E. coli* using Glutathione Sepharose 4B beads (Pharmacia). GST tag was cleaved using Precision protease and purified hAda3 was used as an antigen to produce monoclonal antibodies at the Monoclonal Antibody Core Facility, Lurie Cancer Center, Northwestern University, Chicago. The clones were screened by i) western blotting using 293T cell lysates as an endogenous Ada3 and using flag-tagged Ada3 overexpressing 293T cell lysates and also by ii) immunoprecipitation of endogenous or exogenous Ada3 from 293T cell lysates (data not shown). A few well reacting antibodies were selected among which the clone 5C9/C8 was used for subsequent experiments. Clone 5C9/C8 recognized a single band of estimated size in western blotting and immunoprecipitation. This clone was used for immunoblotting experiments conducted in the paper. Other primary antibodies used to perform immunoblotting were Rb (554136, Pharmingen); Cyclin A (sc-596), Cyclin E (sc-481), Cyclin D1 (sc-20044), Cdk2 (sc-6248), Cdk4 (sc-260), Cdk6 (sc-53638), p27 (sc-1641), p21 (sc-6246), p16 (sc-1661), p300 (sc-585), PCAF (sc-15124) and Hsc-70 (sc-7298) (Santa Cruz Biotechnology, Santa Cruz, CA); c-myc (1472-1, Epitomics); H2B-K5 (07-382), H2B (05-1352), H3 (06-755), H3-K9 (07-352), H3-K56 (07-677) and H4 (05-858) (Millipore); histone Ab sampler kit (H2A-K5, H2A, H2B-K5, H3-K9, H4-K8) (9933, Cell Signaling) and  $\beta$ -actin (A5441, Sigma).

*Generation of recombinant baculoviruses and Ada3-His expression using Bac-to-Bac® Expression System*-Ada3 coding sequence was PCR amplified to contain 6X Histidine tag in the C-terminus and cloned into (Sall and NotI Sites) of pFastBac™ donor plasmid and

the recombinant baculovirus expressing Ada3-His protein was produced following manufacturer's instructions. Sf21 cells infected with recombinant baculovirus were lysed and the Ada3-His protein was purified using Ni-NTA column.

*HAT assay*-HAT assays were carried out in buffer containing 50 mM Tris HCl pH 8.0, 50 mM KCl, 5% glycerol, 0.1 mM EDTA, 1mM DTT, 10mM sodium butyrate, [<sup>3</sup>H] Acetyl Coenzyme-A (Perkin-Elmer) and 1mM PMSF at 30°C using core histones or histone H3 alone as a substrate. Recombinant p300 catalytic domain was purchased from Active Motif. Purified core histones from chicken erythrocytes were purchased from Upstate and purified. Histone H3 from calf thymus was purchased from Roche. Briefly, 10ng of p300 catalytic domain was incubated with varying concentrations of purified baculoviral Ada3 and either 1 ug of core histones or 1 ug of Histone H3 in HAT buffer for 15 min. The products were subjected to SDS-PAGE, transferred to PVDF membranes, and autoradiographed. The PVDF membranes were sprayed with EN<sup>3</sup>HANCE spray (Perkin Elmer) to enhance the signals from tritium prior to autoradiography.

*Microarray analyses*-Three days after infecting *Ada3<sup>FL/FL</sup>* MEFs with Ctrl and Cre Adenoviruses, total RNA was isolated using the TRIzol reagent. Biotin labeled cRNA was generated from 200 ng of total RNA using the Ambion WT Expression Kit (Ambion) per manufacturer's instructions. Hybridization, scanning of the chip and initial scaling was performed as previously described (2); except that Affymetrix GeneChip Mouse Genome 430 2.0 Array was used for cRNA hybridization. Intensities were imported into Affymetrix Expression console software using Robust Multi-chip Averaging (RMA) background correction and fold-change differences between samples were determined. Microarray analysis was performed using duplicate samples and the values represent average of the two independent experiments.

*Time Lapse Microscopy*-24 h after control and Cre adenovirus infection, *Ada3<sup>FL/FL</sup>* MEFs were plated in 6 well plates at 30% confluency. One day after plating, cells were placed on a robotized stage of an Olympus IX81 DSU Spinning Disk confocal microscope equipped with a chamber maintained at 37° C with 5% CO<sub>2</sub>. Movies were acquired over 24 h (10 min intervals) using Hamamatsu ORCA-ERG camera and automated acquisition software (Slidebook Software) at 10x magnification.

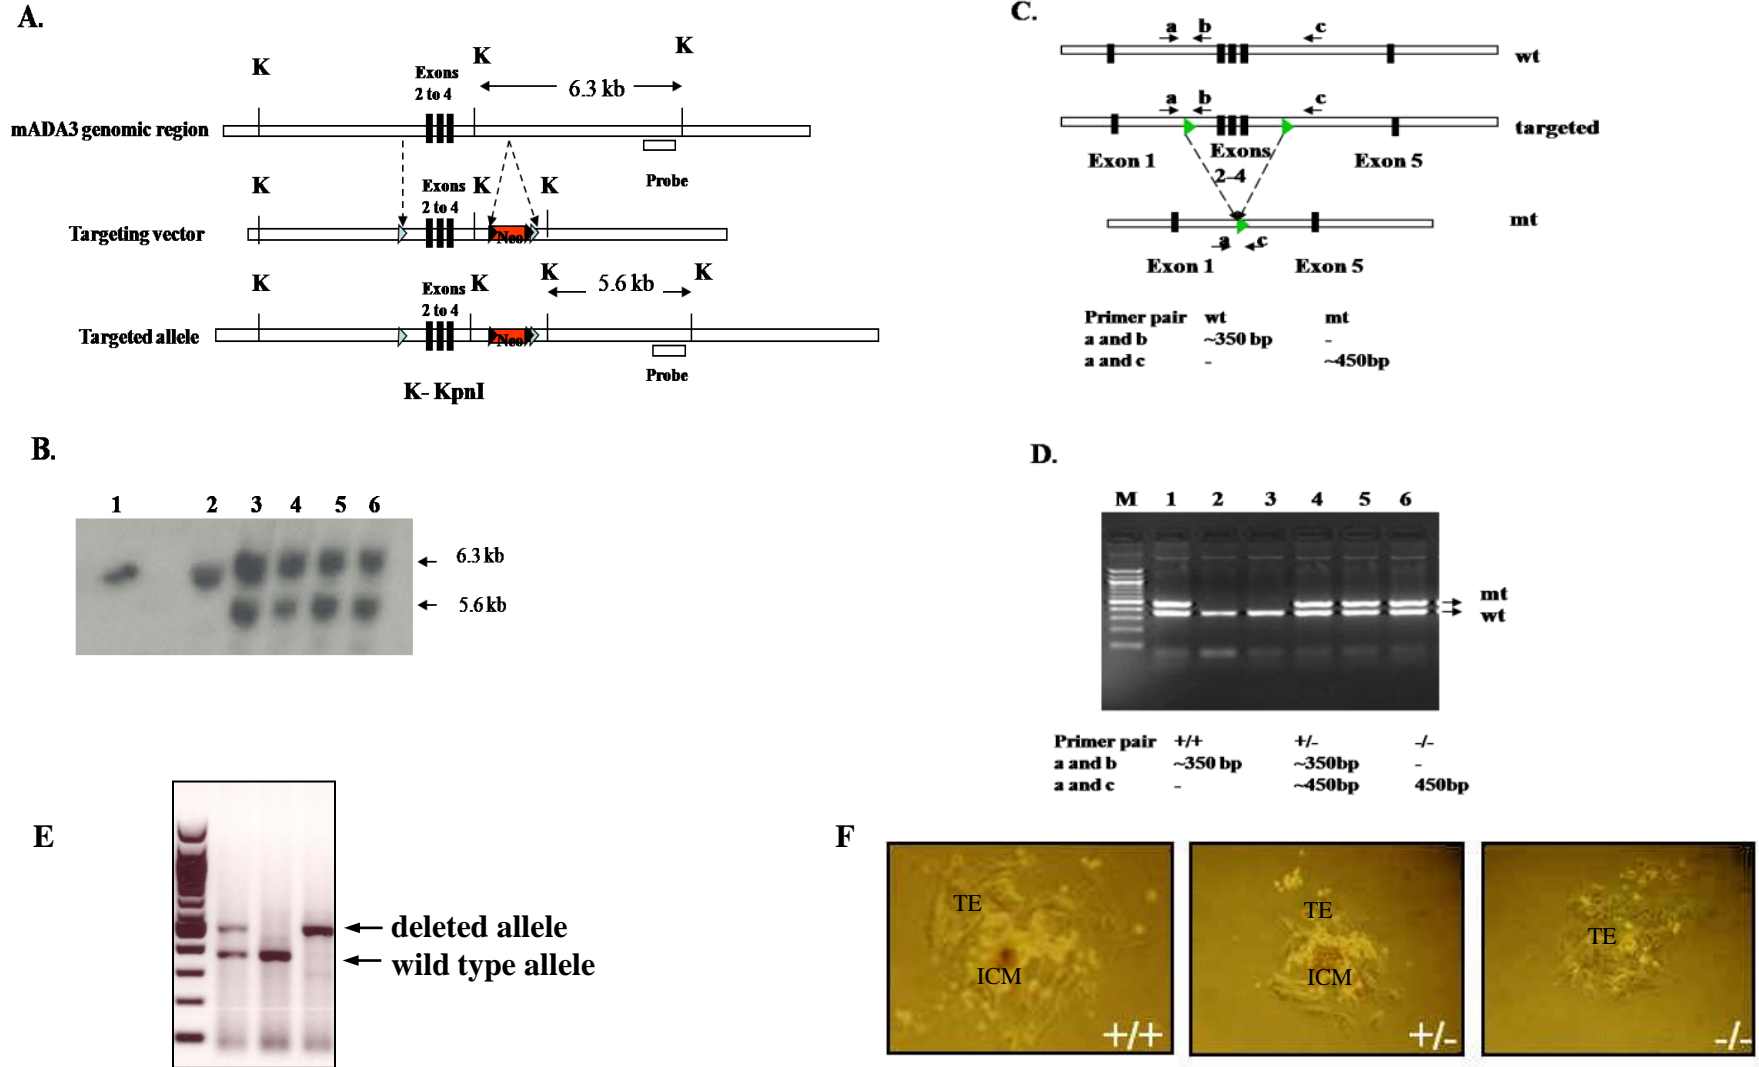

**Supplementary Figure S1. Targeting of *mAda3* locus and PCR genotyping strategy.** (A) Schematic representation of the targeting strategy used to disrupt *mAda3*. (B) Southern blotting of DNA from ES cell clones digested with *KpnI* and probed with *Ada3* locus specific probe; lanes 3-6 represent positive clones; lanes 1 and 2 represent wild type. (C) PCR strategy to screen for the deleted allele. (D) A representative gel picture showing genotyping of a litter from *Ada3*<sup>+/-</sup> intercross. (E) Blastocysts isolated from 3.5 day post coitus from *Ada3*<sup>+/-</sup> females mated with *Ada3*<sup>+/-</sup> males were cultured in DMEM with 10% fetal calf serum for 7 days and the cells recovered from blastocyst outgrowth were subjected to genotyping PCR. A representative gel image showing PCR results of blastocyst outgrowths. (F) Representative microscopic images showing each of the three *Ada3* genotype blastocysts. ICM, inner cell mass; TE, trophoblast.

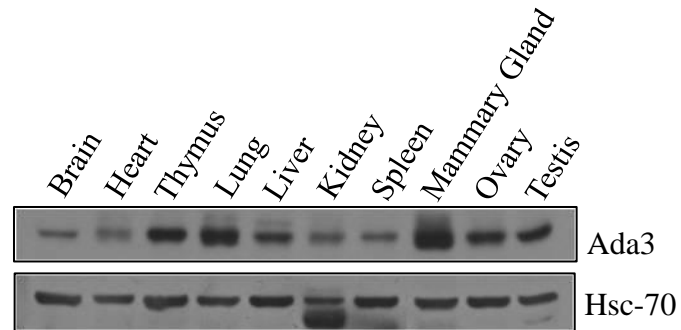

**Supplementary Figure S2. Analysis of Ada3 protein levels in mouse tissues.** Protein lysates obtained from various tissues of an adult wild type mouse were subjected to immunoblotting to determine the expression levels of Ada3 protein.

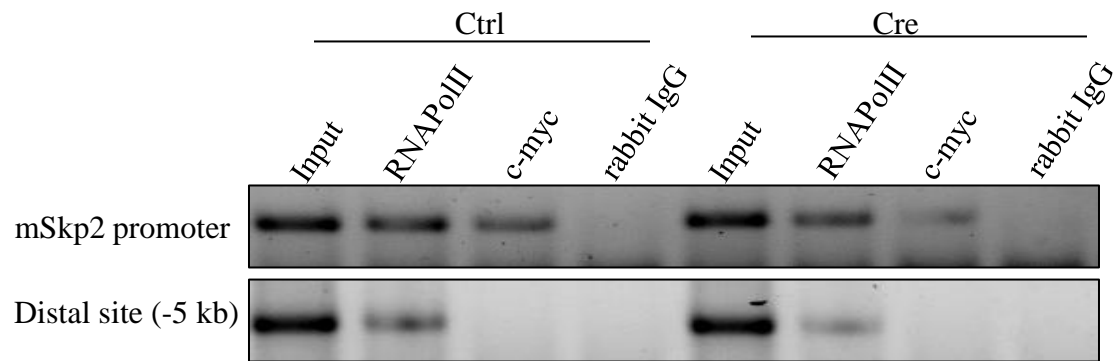

**Supplementary Figure S3. Skp2 promoter occupancy by c-myc is reduced upon deletion of Ada3.** Chromatin fragments from asynchronous control (Ctrl) and Cre *Ada3<sup>FL/FL</sup>* MEFs cells were immunoprecipitated with anti c-myc antibody. The immunoprecipitated DNA was analyzed by PCR, using mouse Skp2 promoter specific primers. Primers amplifying a region that is 5 kb upstream of the mouse Skp2 promoter were used as a negative control.

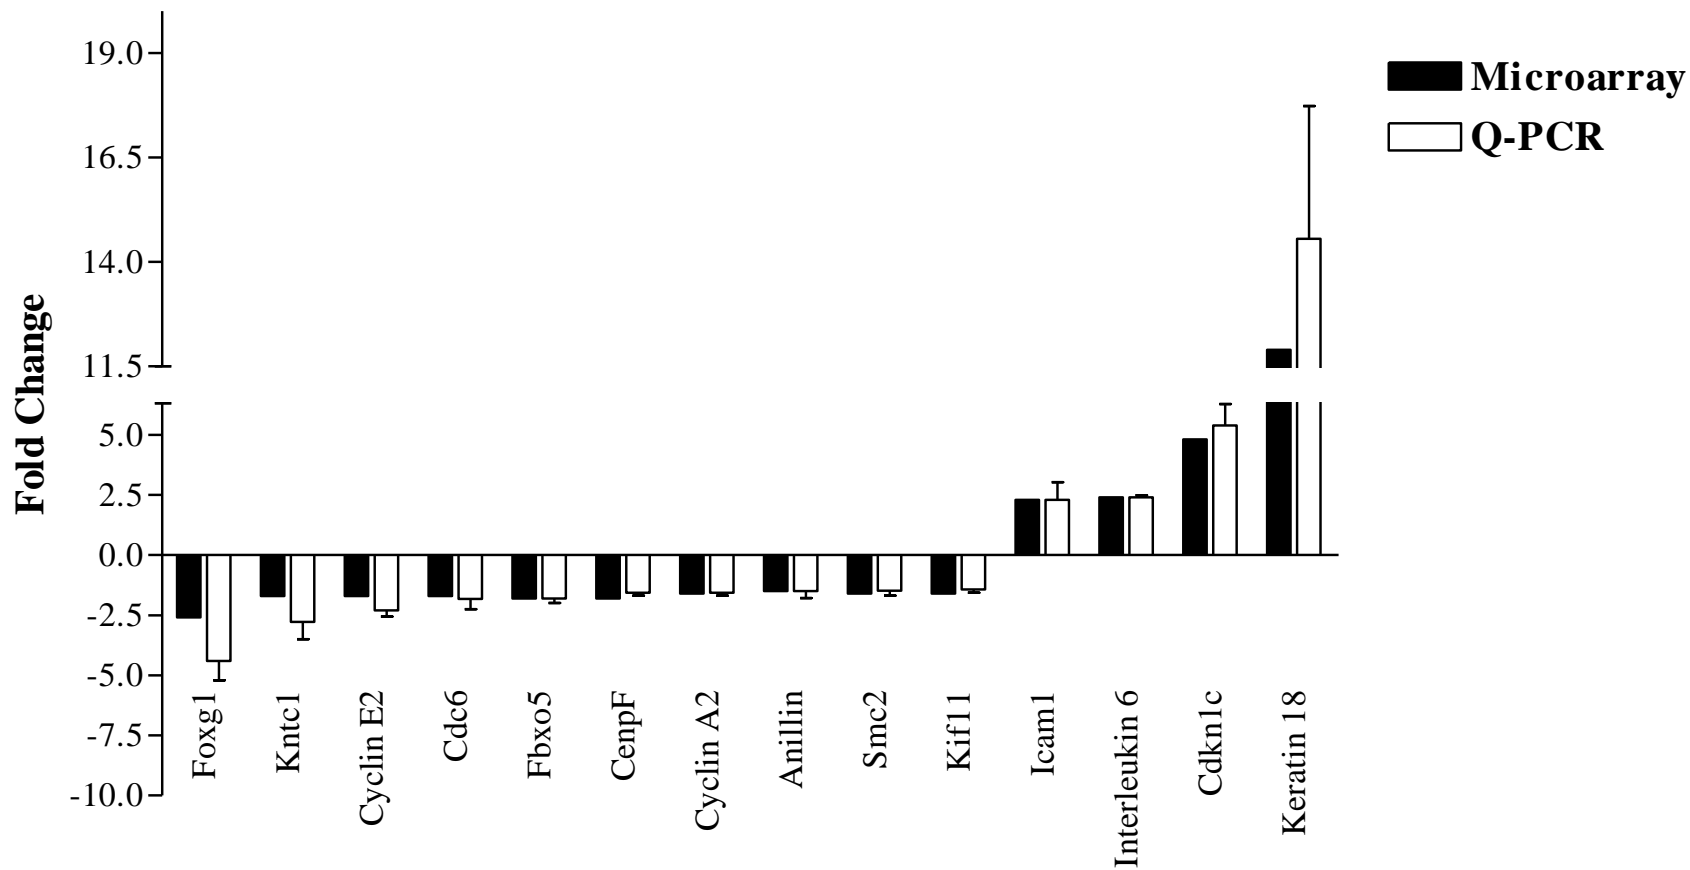

**Supplementary Figure S4. Validation of microarray analysis by q-RT-PCR.** Microarray data from Ctrl and Cre infected MEFs was verified by qRT-PCR by picking several deregulated genes from microarray. Error bars indicate mean  $\pm$  S.E. from three independent experiments.

**A****Network 1: RNA Post-Transcriptional Modification, Cellular Assembly and Organization, Gastrointestinal Disease**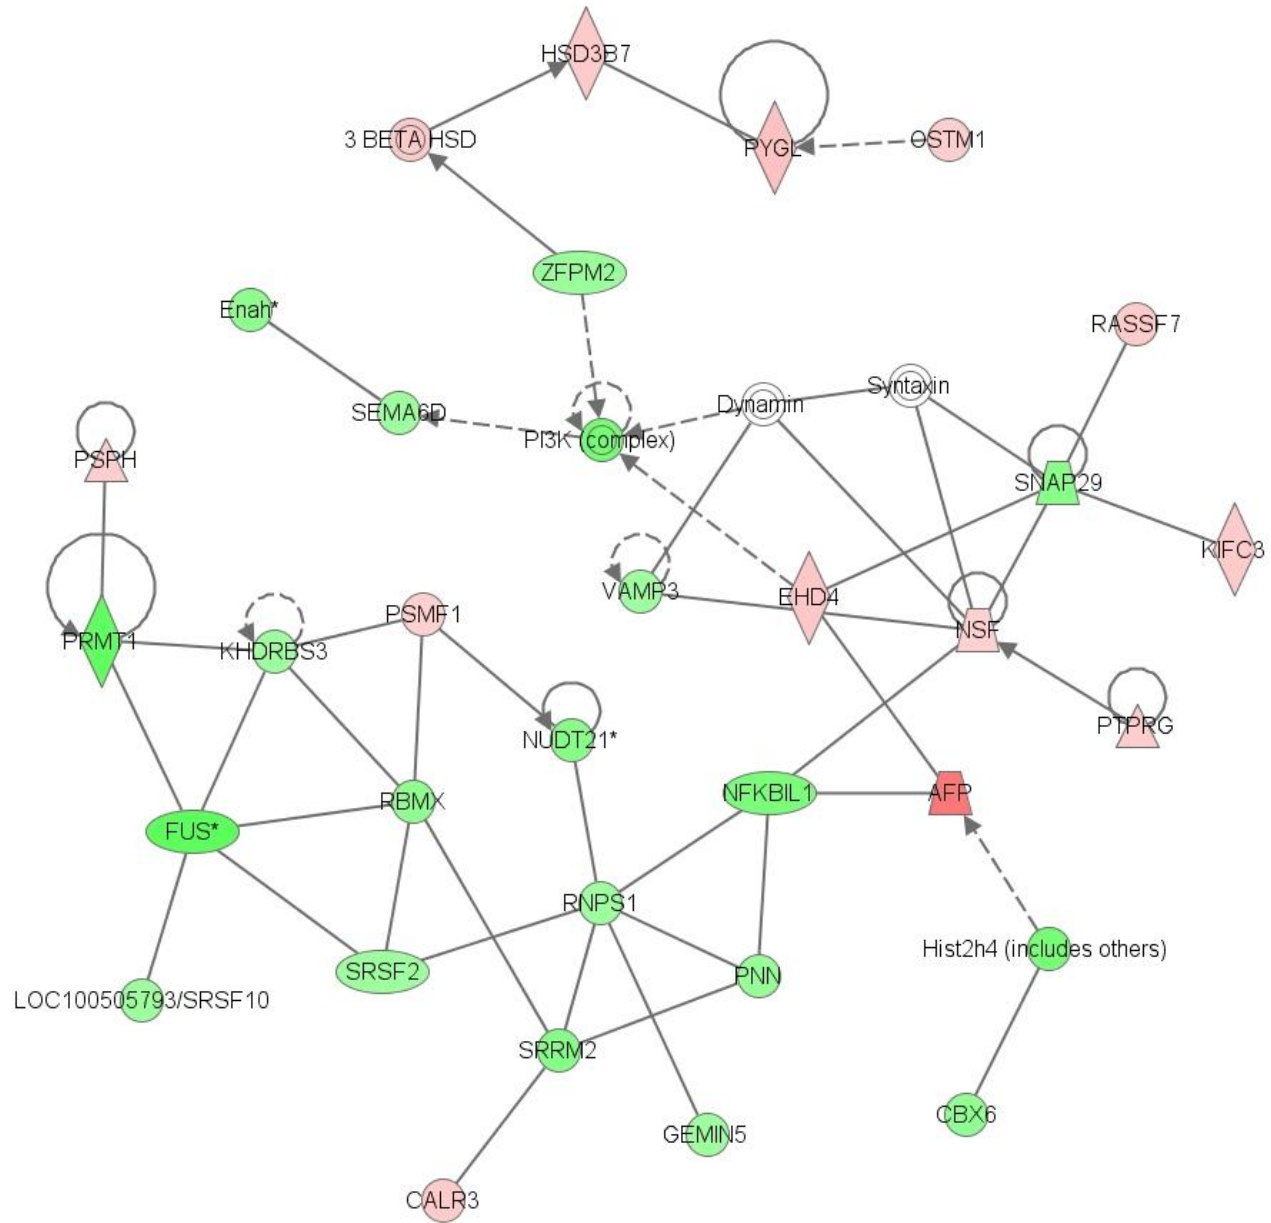

**B****Network 2: Cellular Function and Maintenance, Molecular Transport, Cell Death**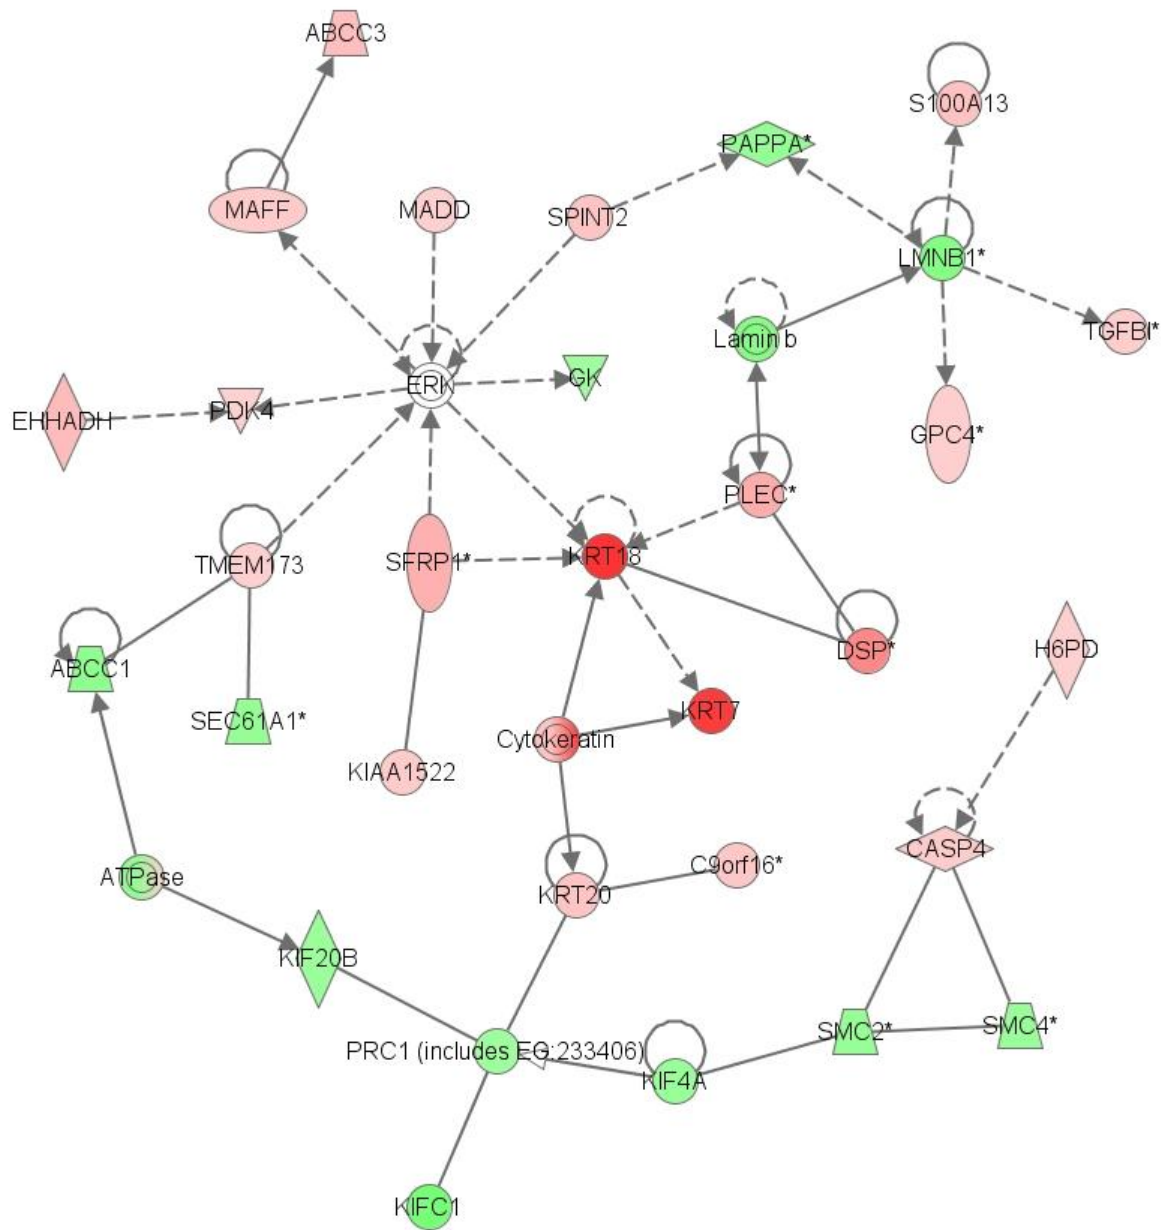



### Network 3: Cell Cycle, Endocrine System Development and Function, Cancer

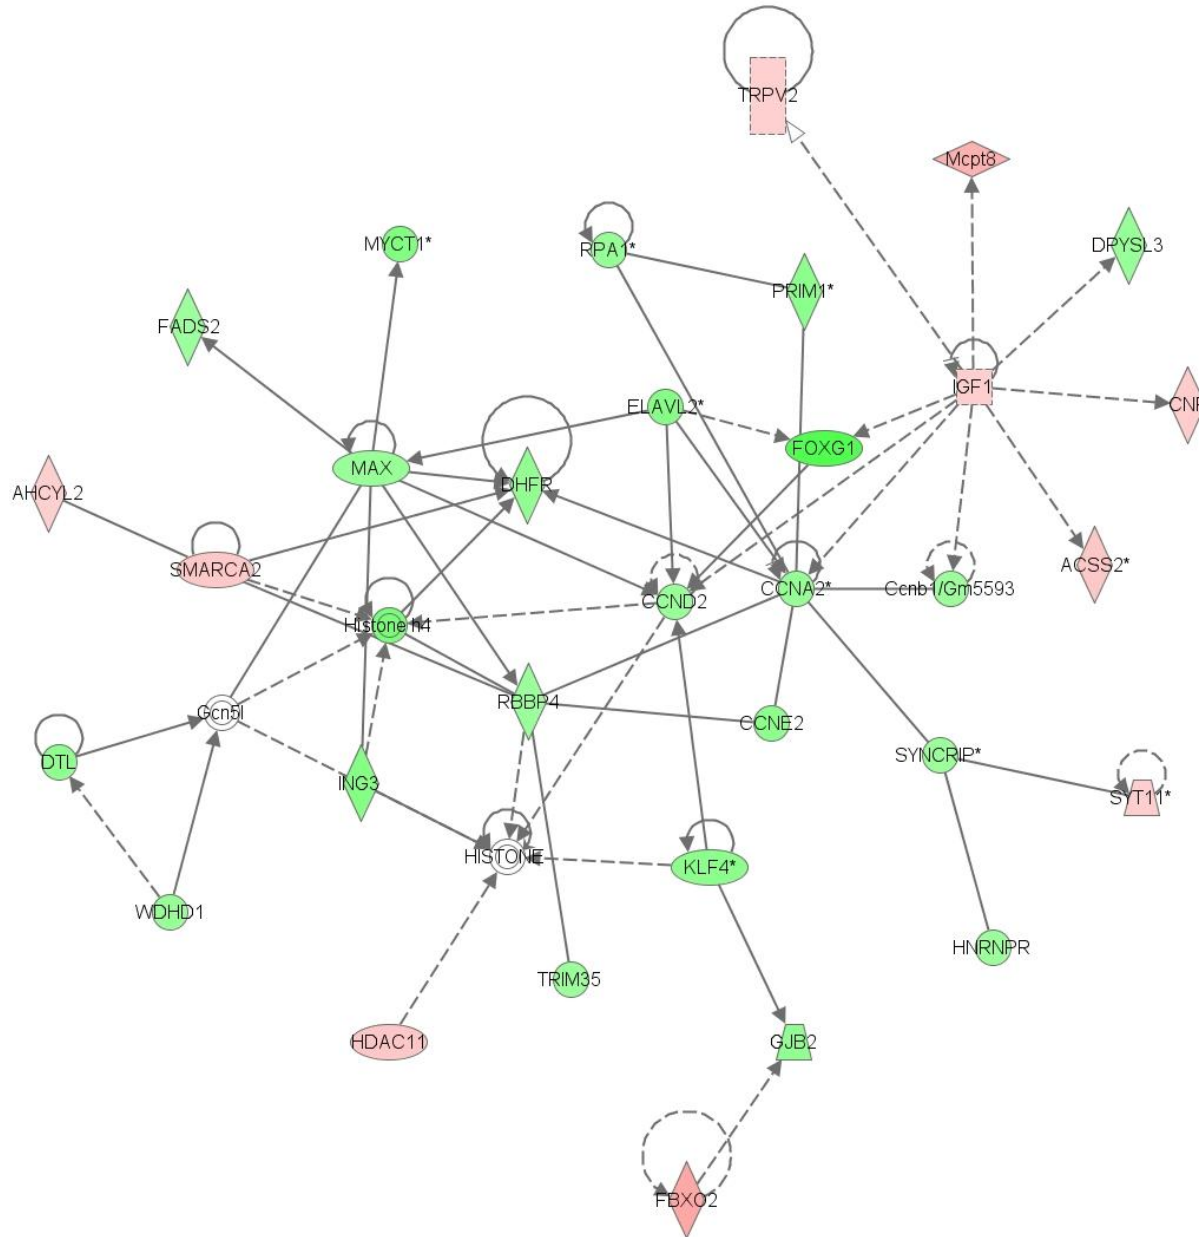

D

### Network 4: Lipid Metabolism, Small Molecule Biochemistry, Cell Death

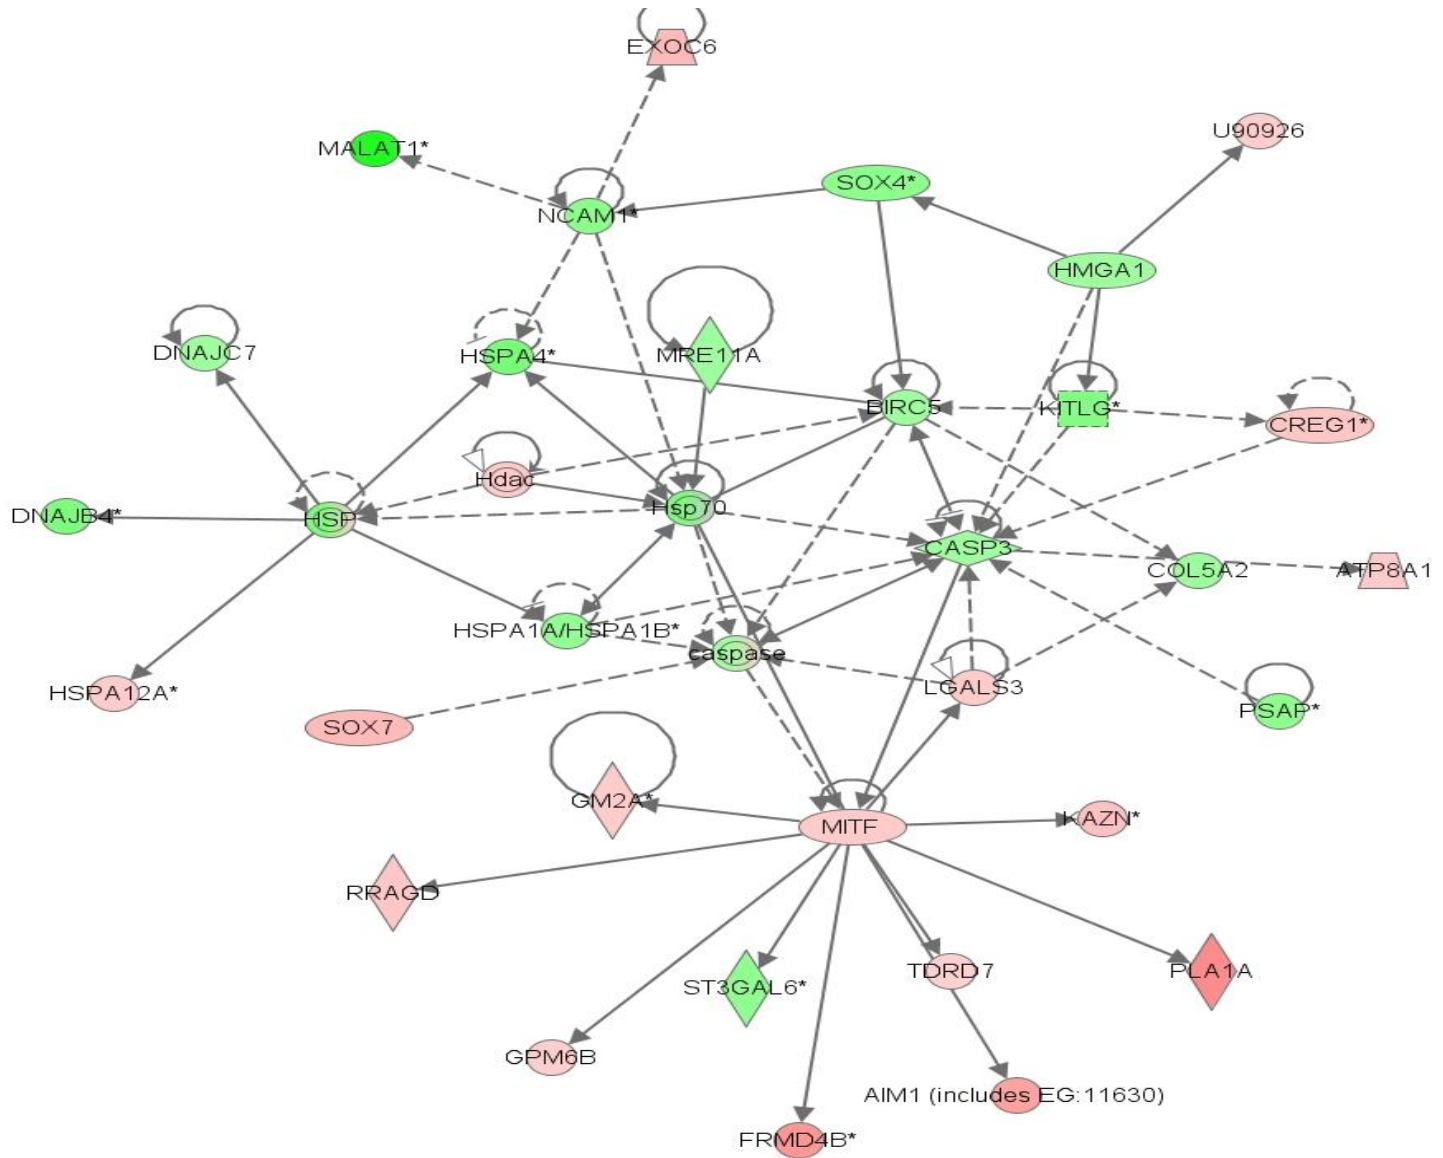

E

## Network 5: Cell Cycle, Cellular Assembly and Organization, DNA Replication, Recombination, and Repair

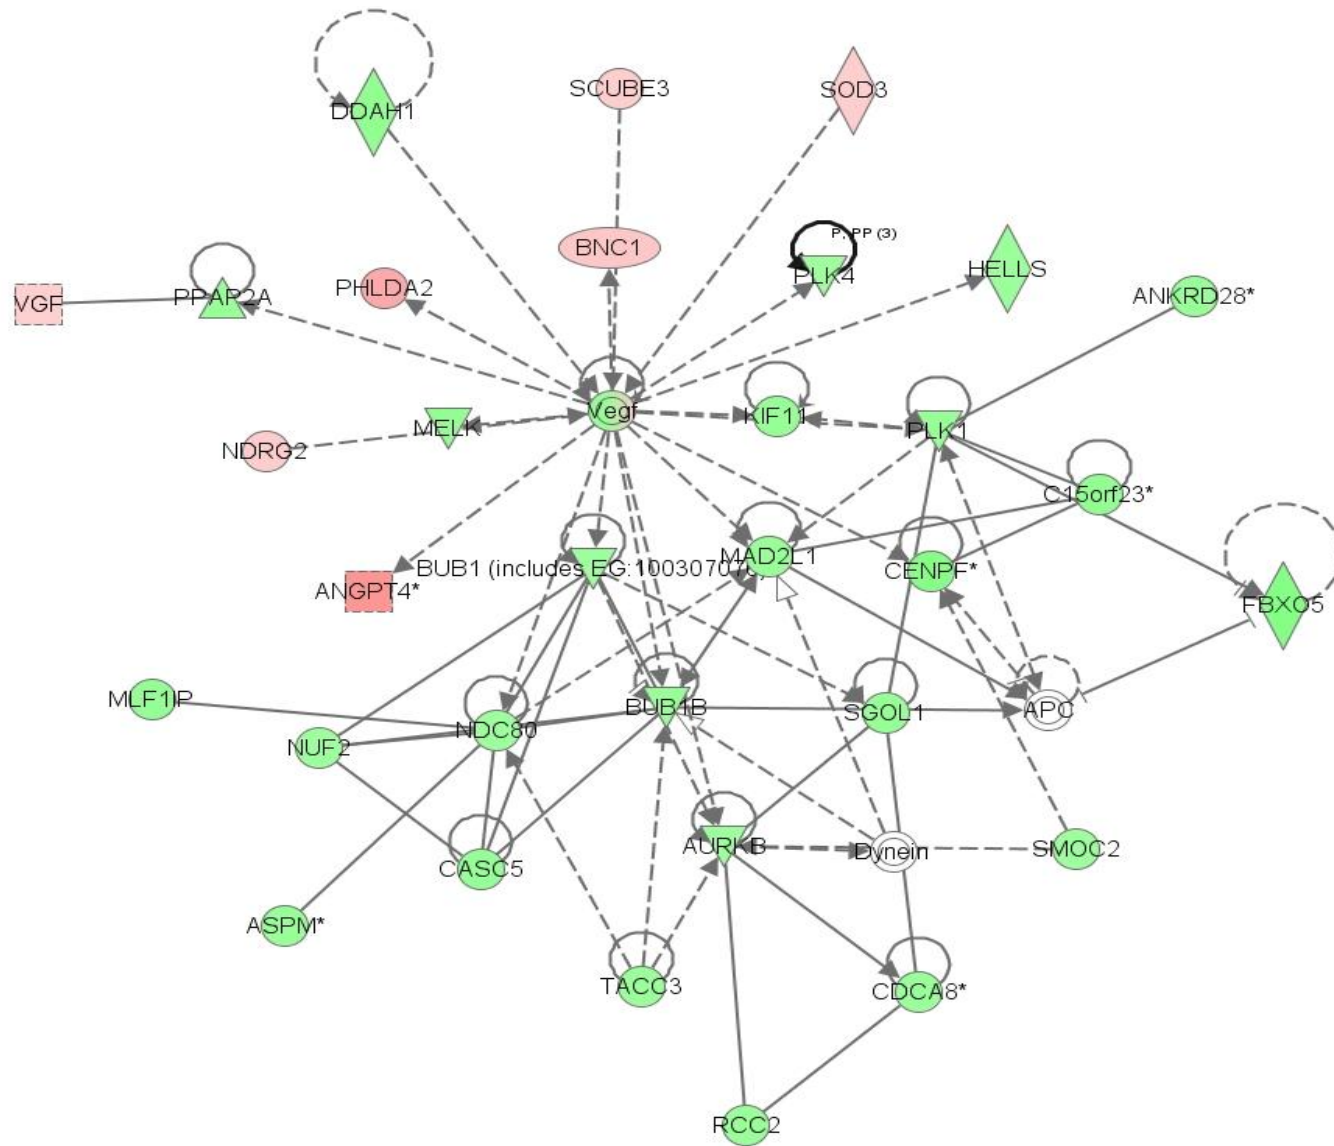

© 2000-2012 Ingenuity Systems, Inc. All rights reserved.

**Supplementary Figure S5. Ingenuity Pathway Analysis.** (A-E) Top 5 networks affected upon Ada3 deletion as obtained by Ingenuity pathway analysis. All the genes that were induced or downregulated at least 1.5 fold were used for the analysis

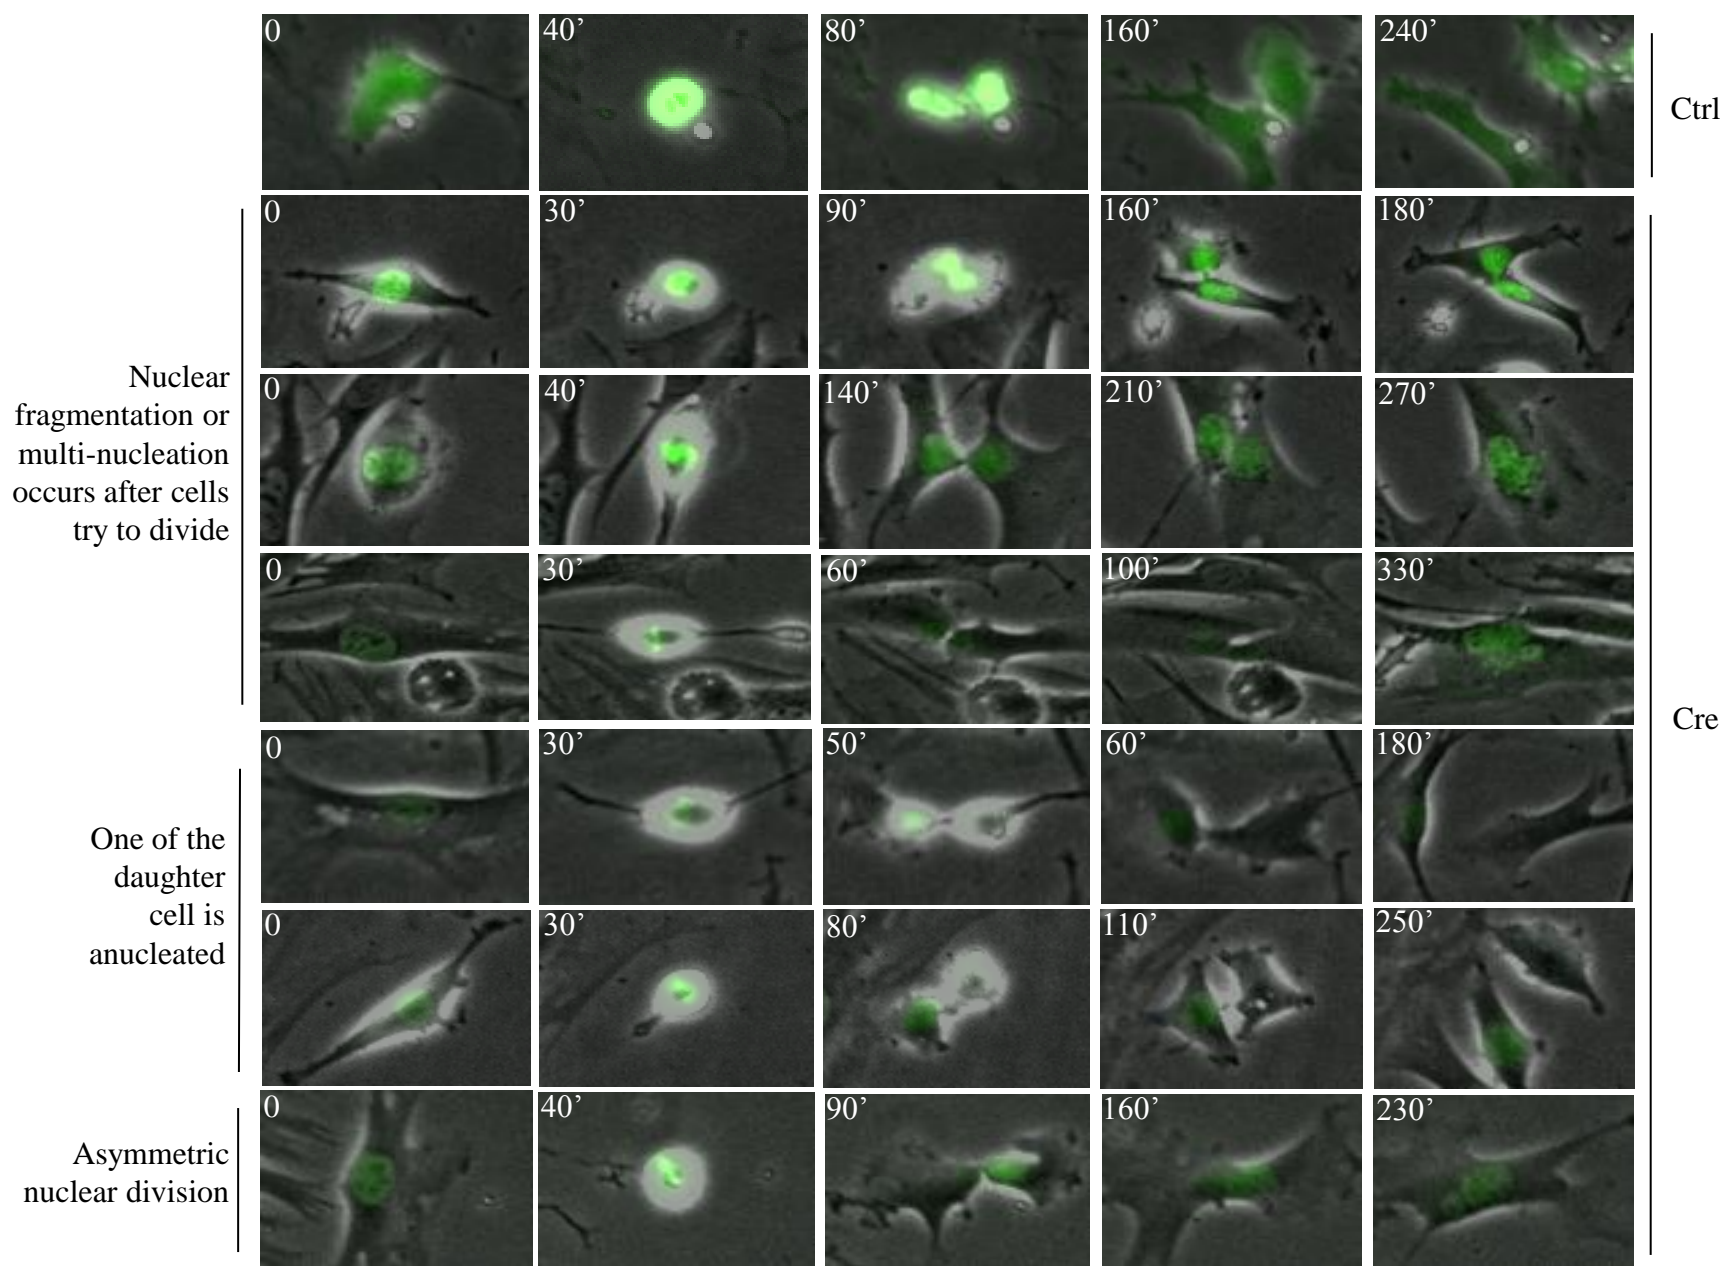

**Supplementary Figure S6. Abnormal cell division of *Ada3*<sup>FL/FL</sup> cells.** Representative time lapse images of *Ada3*<sup>FL/FL</sup> cells after 2 days of infection with control (Ctrl) or Cre adenovirus captured over 24 hours period. Note that cells infected with control virus express eGFP in both cytoplasm and nucleus whereas expression of eGFP in Cre infected cells is restricted to the nucleus. Figures in the upper left hand corner of each image indicate minutes.

**Supplemental Table S1: Deregulated genes in Ada3-deleted cells**

| <b>Gene Symbol</b>              | <b>Representative Public ID</b> | <b>Fold change</b> |
|---------------------------------|---------------------------------|--------------------|
| <b>Downregulated genes</b>      |                                 |                    |
| Hmox1                           | NM_010442                       | 5.4                |
| Cdkn2a                          | NM_009877                       | 4.5                |
| Gsta1 /// Gsta2                 | NM_008182                       | 4.3                |
| Malat1                          | AW012617                        | 3.9                |
| Ptprz1                          | BC002298                        | 3.4                |
| Ptprz1                          | BC002298                        | 3.2                |
| LOC639633 /// Npm3 /// Npm3-ps1 | BB811478                        | 2.7                |
| Foxg1                           | NM_008241                       | 2.6                |
| Stmn2                           | BM115022                        | 2.6                |
| Mex3b                           | BG072837                        | 2.5                |
| Fus                             | AF224264                        | 2.5                |
| Vcan                            | BM251152                        | 2.4                |
| Fam171a2                        | BB452429                        | 2.4                |
| Cd80                            | X60958                          | 2.4                |
| Prmt1                           | AK020120                        | 2.4                |
| 3110039M20Rik                   | AW494150                        | 2.4                |
| Rian                            | AK017440                        | 2.3                |
| Ptk7                            | AK018379                        | 2.3                |
| Psma3                           | C77757                          | 2.3                |
| LOC100047441 /// Msl1           | AW495537                        | 2.3                |
| Zc3h7b                          | BM125518                        | 2.3                |
| Gpr124                          | NM_054044                       | 2.3                |
| Dok1                            | BC013066                        | 2.2                |
| Rtn4                            | NM_024226                       | 2.2                |
| Vip                             | AK018599                        | 2.2                |
| Pik3r1                          | M60651                          | 2.1                |
| Mmp14                           | BB535404                        | 2.1                |
| Plec1                           | BM232239                        | 2.1                |
| Mgp                             | NM_008597                       | 2.1                |
| Rad18                           | AK012795                        | 2.1                |
| 2310076G05Rik                   | BB197581                        | 2.1                |
| Fgf13                           | AF020737                        | 2.1                |
| Setd5                           | BI739725                        | 2.1                |
| Nrk                             | AK012873                        | 2.1                |
| Gja1                            | M63801                          | 2.1                |
| Mycl1                           | BG064871                        | 2.1                |
| Tcfec                           | NM_031198                       | 2.1                |
| Prl8a9                          | AF158744                        | 2.1                |

|                        |           |     |
|------------------------|-----------|-----|
| Hspa4                  | BE912771  | 2.1 |
| 6030442H21Rik          | AK020062  | 2.1 |
| Stxbp6                 | BC024598  | 2.1 |
| Col11a1                | NM_007729 | 2.0 |
| Kifc1 /// LOC100044746 | NM_016761 | 2.0 |
| Plau                   | NM_008873 | 2.0 |
| 2210411K19Rik          | BI694945  | 2.0 |
| Gas7                   | AI506234  | 2.0 |
| Cdc42ep3               | BB012489  | 2.0 |
| Rab5c                  | BC023027  | 2.0 |
| Dhrs3                  | NM_011303 | 2.0 |
| Pip5k1a                | BC003763  | 2.0 |
| A630033H20Rik          | BB034567  | 2.0 |
| Nfkbi1                 | NM_010909 | 2.0 |
| Cdc42ep3               | BB012489  | 2.0 |
| Cd34                   | NM_133654 | 2.0 |
| Arpc3                  | BC013618  | 2.0 |
| Col11a1                | NM_007729 | 2.0 |
| Dnajb4                 | AK006478  | 2.0 |
| LOC100047441 /// Msl1  | AW495537  | 2.0 |
| Epha3                  | AV226618  | 2.0 |
| Cxcr7                  | BC015254  | 2.0 |
| D330050I23Rik          | BE303700  | 2.0 |
| Grb14                  | NM_016719 | 2.0 |
| Plau                   | NM_008873 | 1.9 |
| D17H6S56E-5            | NM_033075 | 1.9 |
| D17H6S56E-5            | NM_033075 | 1.9 |
| Pik3r1                 | BB426164  | 1.9 |
| Lce1h                  | NM_026335 | 1.9 |
| Kitl                   | BB815530  | 1.9 |
| Adra2a                 | BB262415  | 1.9 |
| Sema3a                 | NM_009152 | 1.9 |
| C530008M17Rik          | BB493717  | 1.9 |
| S1pr1                  | BB133079  | 1.9 |
| Atp2b1                 | BI080417  | 1.9 |
| Adamts6                | BB227648  | 1.9 |
| Thoc3                  | BE335845  | 1.9 |
| Myct1                  | AI642973  | 1.9 |
| Arl2bp                 | NM_024191 | 1.9 |
| Stmn2                  | BM115022  | 1.9 |
| Kitl                   | BB815530  | 1.9 |
| Epha7                  | BC026153  | 1.9 |
| Tmem35                 | NM_026239 | 1.9 |

|                         |           |     |
|-------------------------|-----------|-----|
| Cd80                    | AK019867  | 1.9 |
| 2210411K19Rik /// Rpl41 | BI694945  | 1.9 |
| Stom                    | AF093620  | 1.9 |
| Slfn9                   | BI647893  | 1.9 |
| Blnk                    | AF068182  | 1.9 |
| Ptchd1                  | BB271066  | 1.9 |
| Samd4                   | BF319665  | 1.9 |
| Lpar4                   | AW493905  | 1.9 |
| Lmnb1                   | AA270173  | 1.9 |
| Aldh1a1                 | NM_013467 | 1.9 |
| 4921513D23Rik           | AV254721  | 1.9 |
| C130021I20Rik           | AW209204  | 1.9 |
| Rnf25                   | NM_021313 | 1.8 |
| Itgb1                   | BC020152  | 1.8 |
| Dbc1                    | AB060589  | 1.8 |
| Hmgb3                   | NM_008253 | 1.8 |
| Fbxo5                   | AK011820  | 1.8 |
| Rlf                     | BF020283  | 1.8 |
| Jun                     | NM_010591 | 1.8 |
| Unc5c                   | NM_009472 | 1.8 |
| LOC100046744 /// Srrm2  | BQ176063  | 1.8 |
| Tnfrsf11b               | AB013898  | 1.8 |
| 5430416N02Rik           | AW112059  | 1.8 |
| Arl2bp                  | AK006418  | 1.8 |
| Slc20a2                 | BG144370  | 1.8 |
| Elavl2                  | BB105998  | 1.8 |
| Gap43                   | BB622036  | 1.8 |
| Cenpf                   | BE848253  | 1.8 |
| Ing3                    | BB020556  | 1.8 |
| Nudt21                  | BG070110  | 1.8 |
| Edil3                   | BB377340  | 1.8 |
| Slc8a1                  | BB313689  | 1.8 |
| Hipk2                   | AF170301  | 1.8 |
| Maoa                    | AW986246  | 1.8 |
| OTTMUSG00000015563      | AK013448  | 1.8 |
| 9830001H06Rik           | BB093445  | 1.8 |
| Arf6                    | BI248938  | 1.8 |
| Dhcr24                  | BG295389  | 1.8 |
| Alg8                    | BM249614  | 1.8 |
| Snap29                  | BF682880  | 1.8 |
| Fam110c                 | NM_027828 | 1.8 |
| Lpar4                   | BB417145  | 1.8 |
| Ncam1                   | BM201198  | 1.8 |

|                                 |           |     |
|---------------------------------|-----------|-----|
| Lpar4                           | BB297502  | 1.8 |
| Tbx20                           | AK020409  | 1.8 |
| Myct1                           | W34301    | 1.8 |
| Npy1r                           | NM_010934 | 1.8 |
| Spr2k                           | NM_011477 | 1.7 |
| Klf4                            | BG069413  | 1.7 |
| Cenpf                           | BB667318  | 1.7 |
| Gpr149                          | BB126999  | 1.7 |
| D430042O09Rik                   | BB486367  | 1.7 |
| Galnt4                          | AV238718  | 1.7 |
| Prim1                           | J04620    | 1.7 |
| Mcm7                            | NM_008568 | 1.7 |
| A4galt                          | BG064632  | 1.7 |
| Hcn1                            | NM_010408 | 1.7 |
| Macc1                           | BB007136  | 1.7 |
| Dnajb4                          | BC017161  | 1.7 |
| Maoa                            | AV356118  | 1.7 |
| Mirhg1                          | AK017164  | 1.7 |
| Pip5k1a                         | BB822856  | 1.7 |
| OTTMUSG00000015563              | AK013448  | 1.7 |
| Vcan                            | BM251152  | 1.7 |
| Sox4                            | AI428101  | 1.7 |
| Nes                             | AK012622  | 1.7 |
| Psap                            | BM212050  | 1.7 |
| Prpf19                          | BC004070  | 1.7 |
| Ccne2                           | AF091432  | 1.7 |
| Galnt2                          | AF348968  | 1.7 |
| Sema3d                          | BB499147  | 1.7 |
| Cspg4                           | BB377873  | 1.7 |
| BC020402                        | BB029175  | 1.7 |
| Kitl                            | M64262    | 1.7 |
| Vcan                            | NM_019389 | 1.7 |
| Itga4                           | BB205589  | 1.7 |
| Sesn2                           | AV308638  | 1.7 |
| Enah                            | AV329519  | 1.7 |
| Metrn                           | BE947704  | 1.7 |
| Sdpr                            | AV064339  | 1.7 |
| Pola1                           | NM_008892 | 1.7 |
| OTTMUSG00000015563 /// Ppp1r14c | AK013448  | 1.7 |
| Lasp1                           | BC010840  | 1.7 |
| Dusp10                          | NM_022019 | 1.7 |
| Fam110c                         | NM_027828 | 1.7 |
| St3gal6                         | NM_018784 | 1.7 |



|                                                                                       |           |     |
|---------------------------------------------------------------------------------------|-----------|-----|
| Elavl2                                                                                | BB105998  | 1.7 |
| Npnt                                                                                  | AA223007  | 1.7 |
| Aff2                                                                                  | BB342212  | 1.7 |
| Abcc1                                                                                 | NM_008576 | 1.7 |
| Cspg4                                                                                 | BB377873  | 1.7 |
| Serpinb1b                                                                             | AF426025  | 1.7 |
| Brd2                                                                                  | BI155271  | 1.7 |
| Dtl                                                                                   | AV308327  | 1.7 |
| Sema3a                                                                                | NM_009152 | 1.7 |
| Sprr1a                                                                                | NM_009264 | 1.7 |
| Rbm3                                                                                  | NM_011252 | 1.7 |
| Nrn1                                                                                  | AK003046  | 1.7 |
| Swap70                                                                                | AK019882  | 1.7 |
| 4930402H24Rik                                                                         | BQ173880  | 1.7 |
| 9130008F23Rik                                                                         | BB763680  | 1.7 |
| Utp6                                                                                  | BC025074  | 1.7 |
| Kif22                                                                                 | BC003427  | 1.7 |
| Cdc6                                                                                  | NM_011799 | 1.7 |
| LOC627626                                                                             | BB111245  | 1.7 |
| D530037H12Rik                                                                         | BG066910  | 1.7 |
| C330027C09Rik                                                                         | AU018569  | 1.7 |
| Gjb2                                                                                  | AV239646  | 1.7 |
| 100040182 /// 677010 /// EG433003 /// EG619883 ///<br>EG625281 /// EG664969 /// Rpl30 | BB283415  | 1.7 |
| Hspa1b                                                                                | M12573    | 1.7 |
| Gabra4                                                                                | BB430205  | 1.7 |
| Gja1                                                                                  | BB142324  | 1.7 |
| Chtf18                                                                                | BM233289  | 1.7 |
| Cbx6                                                                                  | BC019942  | 1.7 |
| Rab40c                                                                                | AF422144  | 1.7 |
| Kntc1                                                                                 | AW536884  | 1.7 |
| 2610002D18Rik                                                                         | AK011279  | 1.7 |
| 2010300F17Rik                                                                         | AK008491  | 1.7 |
| 2810055G20Rik                                                                         | AK021336  | 1.6 |
| D0H4S114                                                                              | D45203    | 1.6 |
| Sdc1                                                                                  | BI788645  | 1.6 |
| Col10a1                                                                               | NM_009925 | 1.6 |
| Haus6                                                                                 | BB794620  | 1.6 |
| Areg                                                                                  | NM_009704 | 1.6 |
| Cd80                                                                                  | D16220    | 1.6 |
| Sdpr                                                                                  | BE197945  | 1.6 |
| Arl5a                                                                                 | BB811124  | 1.6 |
| Rpl12                                                                                 | BG807990  | 1.6 |

|                                                      |           |     |
|------------------------------------------------------|-----------|-----|
| Fam134c                                              | BC016089  | 1.6 |
| Zdhhc21                                              | BI900142  | 1.6 |
| Klf4                                                 | BG069413  | 1.6 |
| Gja1                                                 | BB039269  | 1.6 |
| Ddah1                                                | BE283964  | 1.6 |
| D0H4S114                                             | BB369191  | 1.6 |
| D2Ert750e                                            | AU019491  | 1.6 |
| Nfib                                                 | BB092799  | 1.6 |
| Psap                                                 | BM212050  | 1.6 |
| Ung                                                  | BC004037  | 1.6 |
| Melk                                                 | NM_010790 | 1.6 |
| Colla2                                               | BB150460  | 1.6 |
| Hspa1b                                               | M12573    | 1.6 |
| Fam65b                                               | BM242294  | 1.6 |
| Erf                                                  | BB453531  | 1.6 |
| Slc7a11                                              | BB453858  | 1.6 |
| Dhfr                                                 | NM_010049 | 1.6 |
| Pcdh18                                               | BM218630  | 1.6 |
| Aldh1a7                                              | NM_011921 | 1.6 |
| C77370                                               | AW495307  | 1.6 |
| Baz1b                                                | BB253608  | 1.6 |
| 2810026P18Rik                                        | AK012825  | 1.6 |
| Tcf19                                                | BC004617  | 1.6 |
| Galnt2                                               | BG064057  | 1.6 |
| Ywhag                                                | NM_018871 | 1.6 |
| Uhrf1                                                | BB702754  | 1.6 |
| Tmem121                                              | AF488729  | 1.6 |
| Nrcam                                                | BB202655  | 1.6 |
| Nufip2                                               | AV112972  | 1.6 |
| Sh3kbp1                                              | AK007283  | 1.6 |
| Pappa                                                | AF439513  | 1.6 |
| Uhrf1                                                | BB702754  | 1.6 |
| Sec61a1                                              | BC003707  | 1.6 |
| Tcf20                                                | AW552808  | 1.6 |
| Mcm7                                                 | NM_008568 | 1.6 |
| Prim1                                                | J04620    | 1.6 |
| Gja1                                                 | M63801    | 1.6 |
| Mfap3l                                               | AV280494  | 1.6 |
| 100042515 /// EG545555 /// EG546331 /// EG665056 /// |           |     |
| ENSMUSG00000060128 /// Hmg1l1 /// Hmgbl ///          |           |     |
| LOC100045972 /// LOC100046019 /// LOC637733          | AV127023  | 1.6 |
| Cck                                                  | NM_031161 | 1.6 |
| Mtm1                                                 | BG976607  | 1.6 |

|                      |           |     |
|----------------------|-----------|-----|
| Foxp2                | BM964154  | 1.6 |
| Tmtc2                | AK018506  | 1.6 |
| Dpp8                 | BM939621  | 1.6 |
| Mlf1p                | BB667813  | 1.6 |
| Myh10                | BQ176159  | 1.6 |
| Fam131b              | AW490145  | 1.6 |
| D2Erttd750e          | AK012148  | 1.6 |
| Foxp2                | AV322952  | 1.6 |
| Kif11                | BB827235  | 1.6 |
| Ccna2                | X75483    | 1.6 |
| Gpr149               | BB075339  | 1.6 |
| Inhba                | NM_008380 | 1.6 |
| OTTMUSG00000015351   | BB830168  | 1.6 |
| Slc40a1              | AF226613  | 1.6 |
| Nes                  | AI413223  | 1.6 |
| Zcchc5               | BQ126004  | 1.6 |
| Orc1l                | BC015073  | 1.6 |
| Ncam1                | BB698413  | 1.6 |
| Diras2               | BM114282  | 1.6 |
| Nmt2                 | AV167182  | 1.6 |
| Sh3kbp1              | AK018032  | 1.6 |
| Hoxb7 /// Hoxb8      | X13721    | 1.6 |
| Dnm3os               | BB542096  | 1.6 |
| Rrm1                 | BB758819  | 1.6 |
| Swap70               | AV024531  | 1.6 |
| Smc2                 | BI684556  | 1.6 |
| Itga5                | AW544851  | 1.6 |
| Lmnb1                | AA270173  | 1.6 |
| Megf10               | AK013855  | 1.6 |
| Sgol1                | BB410537  | 1.6 |
| Flrt2                | BB817332  | 1.6 |
| Gorab                | BB183144  | 1.6 |
| Pcdh9                | BB244656  | 1.6 |
| Nmt2                 | AI503912  | 1.6 |
| Npnt                 | AA223007  | 1.6 |
| Kdm4a                | AA415022  | 1.6 |
| 100039963 /// Sema3a | NM_009152 | 1.6 |
| Hoxb9                | AA386586  | 1.6 |
| Kif22                | BC003427  | 1.6 |
| Flnb                 | BB667380  | 1.6 |
| Casc5                | BB818947  | 1.6 |
| Pappa                | BB635017  | 1.6 |
| Kif2c                | BB104669  | 1.6 |

|                                               |           |     |
|-----------------------------------------------|-----------|-----|
| Trib2                                         | BB354684  | 1.6 |
| Calhm2                                        | NM_133746 | 1.6 |
| Rpa1                                          | BM244983  | 1.6 |
| Lmo4                                          | NM_010723 | 1.6 |
| Anp32a                                        | AF022957  | 1.6 |
| Pdgfc                                         | NM_019971 | 1.6 |
| Cdt1                                          | AF477481  | 1.6 |
| C77370                                        | C77386    | 1.6 |
| Rai14                                         | BB308974  | 1.6 |
| Herc3                                         | AK017531  | 1.6 |
| Hspa4                                         | BB541289  | 1.6 |
| 100040123 /// EG383032 /// EG665772 /// Rps17 | AA030209  | 1.6 |
| Ptprd                                         | BB075247  | 1.6 |
| Flrt2                                         | AW555664  | 1.6 |
| Gja1                                          | AV330726  | 1.6 |
| Serpinb1a                                     | AF426024  | 1.6 |
| Wdhd1                                         | C77437    | 1.6 |
| Mcm7                                          | BB407228  | 1.6 |
| Cd44                                          | X66083    | 1.6 |
| Dis3                                          | BM232345  | 1.6 |
| Ogn                                           | BB542051  | 1.6 |
| Hnrnpul2                                      | BI080136  | 1.6 |
| Usp1                                          | BC018179  | 1.6 |
| Rg9mtd2                                       | AV214521  | 1.6 |
| Stom                                          | AF093620  | 1.6 |
| Plk1                                          | NM_011121 | 1.5 |
| Asb5                                          | NM_029569 | 1.5 |
| Pnn                                           | AV135835  | 1.5 |
| Atad5                                         | BB431627  | 1.5 |
| Ccnd2                                         | NM_009829 | 1.5 |
| ---                                           | BB091802  | 1.5 |
| Klf7                                          | BB524597  | 1.5 |
| Nudt21                                        | BG070110  | 1.5 |
| F630043A04Rik                                 | BG073400  | 1.5 |
| Foxp1                                         | BG962849  | 1.5 |
| Col6a3                                        | AF064749  | 1.5 |
| Mtm1                                          | BG976607  | 1.5 |
| Bub1b                                         | AU045529  | 1.5 |
| Aspm                                          | NM_009791 | 1.5 |
| Hmgb1                                         | BF166000  | 1.5 |
| Foxp1                                         | BG962849  | 1.5 |
| Tnfrsf11b                                     | AB013898  | 1.5 |
| Kif4                                          | NM_008446 | 1.5 |

|                       |           |     |
|-----------------------|-----------|-----|
| Unc5b                 | AK018177  | 1.5 |
| Hipk2                 | AF208292  | 1.5 |
| Anln                  | BI690018  | 1.5 |
| Ppap2a                | NM_008903 | 1.5 |
| Ankrd28               | AV261293  | 1.5 |
| Zwilch                | BC027435  | 1.5 |
| Mki67                 | X82786    | 1.5 |
| Mad211                | NM_019499 | 1.5 |
| LOC100048299 /// Max  | AA617392  | 1.5 |
| Dpysl3                | AV161550  | 1.5 |
| Uty                   | BB742957  | 1.5 |
| Sec61a1               | BC003707  | 1.5 |
| Shcbp1                | NM_011369 | 1.5 |
| Egln3                 | BC022961  | 1.5 |
| Fus                   | AF224264  | 1.5 |
| Zfpm2                 | NM_011766 | 1.5 |
| Rpa1                  | BB491281  | 1.5 |
| Hoxa3                 | BB496114  | 1.5 |
| Rad51ap1              | BC003738  | 1.5 |
| Ncapg                 | BB702347  | 1.5 |
| Hmga2-ps1             | AV377334  | 1.5 |
| S1pr3                 | BB532532  | 1.5 |
| Ivns1abp              | NM_028582 | 1.5 |
| Mtap4                 | BE197560  | 1.5 |
| Itga6                 | BM935811  | 1.5 |
| Zfp101                | BC002058  | 1.5 |
| Smc4                  | AV172948  | 1.5 |
| Gins2                 | AW488914  | 1.5 |
| Pcdh18                | BM218630  | 1.5 |
| LOC100270747          | BB200448  | 1.5 |
| Cct4                  | NM_009837 | 1.5 |
| Mmp14                 | NM_008608 | 1.5 |
| Racgap1               | AF212320  | 1.5 |
| Clspn                 | BG067086  | 1.5 |
| Cdkn2c                | BC027026  | 1.5 |
| Matn2                 | BB338441  | 1.5 |
| 2810417H13Rik         | AK017673  | 1.5 |
| Usp1                  | BC018179  | 1.5 |
| Rgs16                 | U72881    | 1.5 |
| Foxs1                 | BB040642  | 1.5 |
| Rbbp4                 | BF011461  | 1.5 |
| LOC100047340 /// Rcc2 | AV122997  | 1.5 |
| St3gal6               | NM_018784 | 1.5 |

|                   |           |     |
|-------------------|-----------|-----|
| Chaf1b            | BC013532  | 1.5 |
| Kcnk2             | NM_010607 | 1.5 |
| Cdca7             | AK011289  | 1.5 |
| Dnm3os            | BB542096  | 1.5 |
| 6430598A04Rik     | BB387298  | 1.5 |
| Abca5             | BM937648  | 1.5 |
| Col5a2            | AV229424  | 1.5 |
| Ncapg             | BB702347  | 1.5 |
| Alcam             | U95030    | 1.5 |
| Tead2             | D50563    | 1.5 |
| Mfap3l            | AK017269  | 1.5 |
| A230058F20Rik     | AV327739  | 1.5 |
| Mcm7              | BB464359  | 1.5 |
| Kdm2a             | BE690994  | 1.5 |
| Cdca8             | BB702047  | 1.5 |
| Ccdc68            | AV378320  | 1.5 |
| LOC676546 /// Mmd | AA472735  | 1.5 |
| B130021B11Rik     | BM119919  | 1.5 |
| Kif20b            | BB200034  | 1.5 |
| Malat1            | AW012617  | 1.5 |
| D13Erttd787e      | AU020421  | 1.5 |
| Ddit4             | AK017926  | 1.5 |
| Loxl3             | NM_013586 | 1.5 |
| Tacc3             | NM_011524 | 1.5 |
| Cct4              | AV103196  | 1.5 |
| Tk1               | NM_009387 | 1.5 |
| 2700078E11Rik     | BB137173  | 1.5 |
| Pmm1              | BI739353  | 1.5 |
| Ar                | AV232123  | 1.5 |
| Hells             | NM_008234 | 1.5 |
| E2f8              | BM247465  | 1.5 |
| Pcdh9             | BQ177394  | 1.5 |
| Syncrip           | BG920261  | 1.5 |
| Rg9mtd2           | BG063557  | 1.5 |
| Tnik              | AI117633  | 1.5 |
| Calu              | BB120190  | 1.5 |
| Hnrnp1            | BB822465  | 1.5 |
| Arih2             | NM_011790 | 1.5 |
| Ccnb1             | AU015121  | 1.5 |
| Enah              | BQ044016  | 1.5 |
| Trim35            | AB060155  | 1.5 |
| Pif1              | AV094878  | 1.5 |
| Rrm1              | BB758819  | 1.5 |

|                               |           |     |
|-------------------------------|-----------|-----|
| Sox4                          | AI428101  | 1.5 |
| Sema3c                        | NM_013657 | 1.5 |
| Klf6                          | AF072403  | 1.5 |
| Asph                          | AF289490  | 1.5 |
| Ahctf1                        | BM247201  | 1.5 |
| Adam15                        | BC009132  | 1.5 |
| Fscn1                         | NM_007984 | 1.5 |
| Flrt2                         | BG075699  | 1.5 |
| Rad54l                        | AV310220  | 1.5 |
| Hspa1b                        | M12573    | 1.5 |
| Cdca3                         | BI081061  | 1.5 |
| Ptn                           | BC002064  | 1.5 |
| Ttl12                         | BB481662  | 1.5 |
| Dnajc7                        | NM_019795 | 1.5 |
| Nr4a2                         | BB703394  | 1.5 |
| Nuf2                          | AK010351  | 1.5 |
| Sfrs5                         | AW212917  | 1.5 |
| Sema6d                        | BB462688  | 1.5 |
| Ogn                           | BB542051  | 1.5 |
| Cdca8                         | AV307110  | 1.5 |
| Fads2                         | NM_019699 | 1.5 |
| Pdim5                         | AK009464  | 1.5 |
| Btg1                          | BE632903  | 1.5 |
| Bbx                           | BF319769  | 1.5 |
| Cdkn3                         | AK010426  | 1.5 |
| Sf3b3                         | AK017529  | 1.5 |
| Taf1d                         | AV167760  | 1.5 |
| Pdim5                         | NM_022554 | 1.5 |
| Cdh3                          | X06340    | 1.5 |
| Haus6                         | BB827546  | 1.5 |
| Nrp1                          | AK011144  | 1.5 |
| Ndc80                         | NM_023294 | 1.5 |
| Khdrbs3                       | AK014353  | 1.5 |
| Gins2                         | AW488914  | 1.5 |
| Arl15                         | BB445175  | 1.5 |
| Klf6                          | C86813    | 1.5 |
| D16Erttd780e                  | BG069687  | 1.5 |
| Rabgap1                       | BM223600  | 1.5 |
| Mre11a                        | NM_018736 | 1.5 |
| Ctdsp2 /// ENSMUSG00000040540 | BB294133  | 1.5 |
| Gja1                          | BB043407  | 1.5 |
| Osr1                          | NM_011859 | 1.5 |
| Rad51ap1                      | BC003738  | 1.5 |

|                   |           |     |
|-------------------|-----------|-----|
| Syncrip           | BG920261  | 1.5 |
| Ankrd28           | BG066840  | 1.5 |
| Chek1             | BB298208  | 1.5 |
| Sh3kbp1           | BB766215  | 1.5 |
| Aspm              | BB648052  | 1.5 |
| Trim59            | AK012269  | 1.5 |
| Nrp1              | AK011144  | 1.5 |
| Usp1              | BC018179  | 1.5 |
| Inpp11            | BB769433  | 1.5 |
| Ncam1             | NM_010875 | 1.5 |
| Pdgfc             | NM_019971 | 1.5 |
| Bat2              | AK019427  | 1.5 |
| Slc16a4           | AV231970  | 1.5 |
| Exo1              | BE986864  | 1.5 |
| Pbk               | NM_023209 | 1.5 |
| H2afy2 /// H2afy3 | NM_026230 | 1.5 |
| Dleu2             | AA189481  | 1.5 |
| Cyp51             | NM_020010 | 1.5 |
| Klf7              | BB524597  | 1.5 |
| Birc5             | BC004702  | 1.5 |
| 1810032O08Rik     | BM502805  | 1.5 |
| Mfap3l            | AV262974  | 1.5 |
| Fusip1            | NM_010178 | 1.5 |
| B130021B11Rik     | BB386167  | 1.5 |
| Lman1             | BE981934  | 1.5 |
| Alcam             | U95030    | 1.5 |
| Plxdc2            | AK017369  | 1.5 |
| Ubtf              | BB832806  | 1.5 |
| Nfkbiz            | BM240058  | 1.5 |
| Smc2              | NM_008017 | 1.5 |
| Nrp1              | AV291009  | 1.5 |
| Bub1              | AF002823  | 1.5 |
| Metrl             | BC024445  | 1.5 |
| Casp3             | D86352    | 1.5 |
| Kpna6             | BC004833  | 1.5 |
| Sfrs2             | AK011528  | 1.5 |
| Usp47             | BG071065  | 1.5 |
| Hmgb1             | AI648759  | 1.5 |
| Gemin5            | BB824003  | 1.5 |
| Socs2             | NM_007706 | 1.5 |
| BC055324          | AV132065  | 1.5 |
| Tmeff2            | NM_019790 | 1.5 |
| Srebf2            | BM123132  | 1.5 |



|                                                      |           |      |
|------------------------------------------------------|-----------|------|
| Rnps1                                                | NM_009070 | 1.5  |
| Smc4                                                 | BI665568  | 1.5  |
| Agap3                                                | AF459091  | 1.5  |
| Tulp4                                                | BB667130  | 1.5  |
| Suv39h2                                              | NM_022724 | 1.5  |
| Epb4.1l2                                             | BE951907  | 1.5  |
| Rtn4                                                 | BG072267  | 1.5  |
| Aurkb                                                | BC003261  | 1.5  |
| Dpy19l1                                              | BM119324  | 1.5  |
| Lsm2                                                 | AF204156  | 1.5  |
| Ppp3r1                                               | NM_024459 | 1.5  |
| EG383815 /// EG547267 /// EG668041 /// LOC677113 /// |           |      |
| Rps24                                                | BM119287  | 1.5  |
| Klf7                                                 | BB524597  | 1.5  |
| 1110019D14Rik                                        | AK003812  | 1.5  |
| Vamp3                                                | NM_009498 | 1.5  |
| Plk4                                                 | AI385771  | 1.5  |
| Sprr2h                                               | NM_011474 | 1.5  |
| Gyk                                                  | BF683028  | 1.5  |
| Ssrp1                                                | BC024835  | 1.5  |
| Rgs2                                                 | AF215668  | 1.5  |
| Klc1                                                 | AU079968  | 1.5  |
| Sdpr                                                 | BE197945  | 1.5  |
| Pde4b                                                | BM246564  | 1.5  |
| Wee1                                                 | NM_009516 | 1.5  |
| 9430008C03Rik                                        | BF466702  | 1.5  |
| AW551984                                             | AV220682  | 1.5  |
| Smoc2                                                | AK006809  | 1.5  |
| Ccna2                                                | X75483    | 1.5  |
| Hmga1                                                | NM_016660 | 1.5  |
| Prc1                                                 | BC005475  | 1.5  |
| <b>Upregulated genes</b>                             |           |      |
| Bex1                                                 | NM_009052 | 14.0 |
| Krt18                                                | NM_010664 | 11.9 |
| Plcxdl                                               | BB311508  | 9.1  |
| Mpzl2                                                | BC015076  | 7.3  |
| Crym                                                 | NM_016669 | 7.2  |
| Aard                                                 | AV256613  | 6.5  |
| Mpzl2                                                | BC015076  | 6.5  |
| Cadm4                                                | AY059394  | 6.4  |
| Krt7                                                 | BC010337  | 6.2  |
| Clu /// LOC100046120                                 | AV152288  | 5.7  |
| LOC100048346 /// Usp18                               | NM_011909 | 5.2  |

|                      |           |     |
|----------------------|-----------|-----|
| Ifi44                | BB329808  | 5.2 |
| Cdkn1c               | NM_009876 | 4.8 |
| Car3                 | NM_007606 | 4.7 |
| Oasl2                | BQ033138  | 4.6 |
| Clu /// LOC100046120 | AV075715  | 4.6 |
| Bst1                 | AI647987  | 4.4 |
| Afp                  | NM_007423 | 4.3 |
| D630045M09Rik        | BG069496  | 4.1 |
| Trim30               | AF220015  | 4.1 |
| Prom1                | NM_008935 | 4.0 |
| Ifit1                | NM_008331 | 3.9 |
| Tgtp /// Tgtp2       | NM_011579 | 3.9 |
| Dsp                  | AV297961  | 3.8 |
| Clu /// LOC100046120 | NM_013492 | 3.7 |
| Pla1a                | NM_134102 | 3.6 |
| Lyz1                 | AV066625  | 3.6 |
| 2010204K13Rik        | NM_023450 | 3.6 |
| Itih5                | AK018605  | 3.6 |
| Abhd3                | NM_134130 | 3.6 |
| H2-Q7                | M29881    | 3.6 |
| Nefl                 | M20480    | 3.5 |
| Xaf1                 | BB645745  | 3.5 |
| Apol9a /// Apol9b    | BC020489  | 3.5 |
| Synpo2l              | BB322227  | 3.5 |
| Dsp                  | AV297961  | 3.5 |
| Iigp1                | BM239828  | 3.5 |
| Rtp4                 | BC024872  | 3.4 |
| Cmpk2                | AK004595  | 3.4 |
| Angpt4               | AV269710  | 3.3 |
| AI451617 /// Trim30  | BG068242  | 3.3 |
| Iigp1                | BM239828  | 3.3 |
| Frmd4b               | BB009122  | 3.3 |
| 677168 /// Isg15     | AK019325  | 3.3 |
| Trim63               | BG817292  | 3.2 |
| Spns2                | BC025823  | 3.2 |
| Lyz1                 | AV058500  | 3.2 |
| Gbp3                 | NM_018734 | 3.2 |
| Tnfsf9               | NM_009404 | 3.2 |
| Igtp                 | NM_018738 | 3.2 |
| Trim30               | BM240719  | 3.2 |
| Slc2a3               | BB414515  | 3.2 |
| Clu /// LOC100046120 | BB433678  | 3.1 |
| Slc2a3               | BB414515  | 3.1 |

|                               |           |     |
|-------------------------------|-----------|-----|
| Ifit3                         | NM_010501 | 3.1 |
| Fxyd6                         | AB032010  | 3.1 |
| C3                            | K02782    | 3.0 |
| Loxl4                         | NM_053083 | 3.0 |
| Irgm2                         | NM_019440 | 2.9 |
| Aim1                          | BM233292  | 2.9 |
| Il18                          | NM_008360 | 2.9 |
| F5                            | NM_007976 | 2.9 |
| Prr9                          | BB150166  | 2.9 |
| Fgl2                          | BF136544  | 2.9 |
| AI451617                      | BM241342  | 2.8 |
| F5                            | NM_007976 | 2.8 |
| Clip4                         | BM217861  | 2.8 |
| Kng1                          | NM_023125 | 2.8 |
| Rgs4                          | NM_009062 | 2.8 |
| Hck                           | NM_010407 | 2.8 |
| Fbxo2                         | BB311718  | 2.8 |
| OTTMUSG00000025408            | AU022548  | 2.7 |
| Ms4a4d                        | NM_025658 | 2.7 |
| Vnn1                          | AV360029  | 2.7 |
| Afap112                       | BG068103  | 2.7 |
| Phlda2                        | NM_009434 | 2.7 |
| Lyz2                          | AW208566  | 2.7 |
| Ifi203                        | BC008167  | 2.7 |
| Wnt4                          | NM_009523 | 2.7 |
| Cntf /// Zfp91 /// Zfp91-cntf | NM_053007 | 2.6 |
| Cd38                          | BB256012  | 2.6 |
| LOC671535 /// Plec1           | BI525140  | 2.6 |
| Mogat2                        | BB414982  | 2.6 |
| Ccl8                          | NM_021443 | 2.6 |
| Stat1                         | AW214029  | 2.6 |
| Adssl1                        | NM_007421 | 2.6 |
| Angpt4                        | NM_009641 | 2.6 |
| Rsad2                         | BB741897  | 2.5 |
| G530011O06Rik                 | BB276544  | 2.5 |
| Vnn1                          | NM_011704 | 2.5 |
| Wdr40b                        | BB274776  | 2.5 |
| Sfrp1                         | BI658627  | 2.5 |
| 1190002H23Rik                 | BB408123  | 2.5 |
| Acpp                          | BB008092  | 2.5 |
| Gch1                          | BB698398  | 2.5 |
| Liph                          | BB367422  | 2.5 |
| Ifi205 /// Mnda               | AI481797  | 2.5 |

|                        |           |     |
|------------------------|-----------|-----|
| Phyh                   | NM_010726 | 2.5 |
| Plscr2                 | NM_008880 | 2.5 |
| Cox7a1                 | AF037370  | 2.5 |
| Ndrp1                  | AI987929  | 2.5 |
| 1700112E06Rik          | BB246912  | 2.5 |
| Ifih1                  | AY075132  | 2.4 |
| Parp14                 | BC021340  | 2.4 |
| Olr1                   | NM_138648 | 2.4 |
| Gbp6                   | BM241271  | 2.4 |
| Igfbp4                 | BC019836  | 2.4 |
| Escr                   | BB736636  | 2.4 |
| Mcpt8                  | NM_008572 | 2.4 |
| Dock9                  | BB795072  | 2.4 |
| Cadm1                  | NM_018770 | 2.4 |
| Il6                    | NM_031168 | 2.4 |
| Pstpip1                | U87814    | 2.4 |
| Ifi203                 | NM_008328 | 2.4 |
| Lce3f /// LOC630971    | AV076385  | 2.4 |
| AI451557               | AV277444  | 2.4 |
| Rgs4                   | NM_009062 | 2.4 |
| Cxcl14                 | AF252873  | 2.4 |
| Gal3st1                | AK002510  | 2.4 |
| Ddx58                  | BB401061  | 2.4 |
| Gbp2                   | BE197524  | 2.4 |
| Tmem37                 | BC024613  | 2.4 |
| Rsad2                  | BB132493  | 2.4 |
| Slpi                   | NM_011414 | 2.4 |
| Aldh1a2                | NM_009022 | 2.4 |
| Lcn2                   | X14607    | 2.4 |
| H2-K1                  | BC011306  | 2.4 |
| LOC100047963 /// Tor3a | AK009693  | 2.4 |
| Cyb561                 | BC006732  | 2.4 |
| Ndrp1                  | AV309418  | 2.4 |
| 1190002H23Rik          | NM_025427 | 2.4 |
| Akr1c21                | AW146041  | 2.4 |
| Mpa21                  | BG092512  | 2.3 |
| Rnf144b                | AV274826  | 2.3 |
| Pcdh21                 | NM_130878 | 2.3 |
| Gbp2                   | NM_010260 | 2.3 |
| H2-K1                  | S70184    | 2.3 |
| Tmem86a                | AK007864  | 2.3 |
| Upk1b                  | BB427704  | 2.3 |
| Stat2                  | AF088862  | 2.3 |

|                                  |        |           |     |
|----------------------------------|--------|-----------|-----|
| Steap4                           |        | NM_054098 | 2.3 |
| H2-D1 /// H2-K1 /// LOC100044874 |        | L23495    | 2.3 |
| Igfbp3                           |        | AV175389  | 2.3 |
| Abat                             |        | BF462185  | 2.3 |
| Syt13                            |        | BB244585  | 2.3 |
| Frmd4b                           |        | BG067753  | 2.3 |
| Slc39a4                          |        | BC023498  | 2.3 |
| BC006779                         |        | BE853170  | 2.3 |
| Pfkfb3                           |        | NM_133232 | 2.3 |
| Cd38                             |        | NM_007646 | 2.3 |
| Krt80                            |        | NM_028770 | 2.3 |
| Mocos                            |        | AK003797  | 2.3 |
| Bace2                            |        | NM_019517 | 2.3 |
| Icam1                            |        | BC008626  | 2.3 |
| Smpdl3b                          |        | NM_133888 | 2.3 |
| Oas1a                            |        | BC018470  | 2.3 |
| Trim21                           |        | BC010580  | 2.2 |
| Lgals3bp                         |        | NM_011150 | 2.2 |
| Stat1                            |        | AW214029  | 2.2 |
| Itga3                            |        | BI664675  | 2.2 |
| Crispld2                         |        | BB745401  | 2.2 |
| Dock9                            |        | BB795072  | 2.2 |
| Dtx3l                            |        | BB705351  | 2.2 |
| Apcdd1                           |        | BB271021  | 2.2 |
| Tor3a                            |        | NM_023141 | 2.2 |
| Isg20                            |        | BC022751  | 2.2 |
| Dhx58                            |        | AF316999  | 2.2 |
|                                  | 677168 | AK019325  | 2.2 |
| Il11                             |        | NM_008350 | 2.2 |
| Cxcl14                           |        | AF252873  | 2.2 |
| Apcdd1                           |        | BB770932  | 2.2 |
| Taf9b                            |        | AW555571  | 2.2 |
| Bst2                             |        | BC008532  | 2.2 |
| Adcy9                            |        | BB795229  | 2.2 |
| Cxcl10                           |        | NM_021274 | 2.2 |
| Sox7                             |        | NM_011446 | 2.2 |
| Ablim1                           |        | BG065289  | 2.2 |
| Ly6f                             |        | NM_008530 | 2.2 |
| C1qtnf2                          |        | BF148029  | 2.2 |
| Igfbp3                           |        | AI649005  | 2.2 |
| Stard5                           |        | BI076697  | 2.2 |
| Wdr40b                           |        | BB274776  | 2.2 |
| 2610019F03Rik                    |        | AK011462  | 2.2 |

|               |           |     |
|---------------|-----------|-----|
| Stat2         | AF088862  | 2.2 |
| Ntf5          | AI462899  | 2.2 |
| Psmb8         | NM_010724 | 2.1 |
| Exoc6         | AV248277  | 2.1 |
| Parp9         | NM_030253 | 2.1 |
| Susd2         | AK004703  | 2.1 |
| Gch1          | NM_008102 | 2.1 |
| 2600010E01Rik | AK014682  | 2.1 |
| Timp3         | BI111620  | 2.1 |
| Dtx3l         | AV327407  | 2.1 |
| Scel          | NM_022886 | 2.1 |
| Wnt7a         | AK004683  | 2.1 |
| Stat1         | AW214029  | 2.1 |
| Ehhadh        | NM_023737 | 2.1 |
| Fam174b       | BG073439  | 2.1 |
| Slc9a3r1      | BB805362  | 2.1 |
| Sord          | AV253518  | 2.1 |
| Csf1r         | AI323359  | 2.1 |
| Car2          | NM_009801 | 2.1 |
| Spon2         | NM_133903 | 2.1 |
| Mmp13         | NM_008607 | 2.1 |
| Timp3         | BI111620  | 2.1 |
| Sema3b        | NM_009153 | 2.1 |
| C920025E04Rik | NM_010398 | 2.1 |
| Nkd2          | BB767757  | 2.1 |
| Spr2a         | NM_011468 | 2.1 |
| D14Ert668e    | AV280841  | 2.1 |
| Igfbp4        | BB787243  | 2.1 |
| Flt4          | AI323512  | 2.1 |
| Crispld2      | BB558800  | 2.1 |
| Aif1l         | BC024599  | 2.1 |
| Crispld2      | AK019034  | 2.1 |
| Abca1         | BB144704  | 2.1 |
| Mrgpre        | BB373312  | 2.1 |
| Prrg3         | BB164509  | 2.1 |
| Lox14         | NM_053083 | 2.1 |
| Ptx3          | NM_008987 | 2.1 |
| Hp            | NM_017370 | 2.0 |
| Rab40b        | AV364488  | 2.0 |
| Ifi35         | BC008158  | 2.0 |
| Abcc3         | AK006128  | 2.0 |
| Afap1l1       | BB106834  | 2.0 |
| AI451617      | BG068242  | 2.0 |

|                    |       |           |     |        |     |  |  |
|--------------------|-------|-----------|-----|--------|-----|--|--|
| Axin2              |       | BB398993  | 2.0 |        |     |  |  |
| Ifi204             |       | NM_008329 | 2.0 |        |     |  |  |
| Sema4f             |       | BB271145  | 2.0 |        |     |  |  |
| Crabp2             |       | BC018397  | 2.0 |        |     |  |  |
| Maf                |       | AV284857  | 2.0 |        |     |  |  |
| Gzme               |       | NM_010373 | 2.0 |        |     |  |  |
| Cxcl1              |       | BB554288  | 2.0 |        |     |  |  |
| Reep6              |       | AK002562  | 2.0 |        |     |  |  |
| Nppb               |       | NM_008726 | 2.0 |        |     |  |  |
| Trim34             |       | AF220142  | 2.0 |        |     |  |  |
| Cxcl1              |       | NM_008176 | 2.0 |        |     |  |  |
| Sgcb               |       | AI844814  | 2.0 |        |     |  |  |
| Ifi35              |       | AW986054  | 2.0 |        |     |  |  |
| Rab3d              |       | BB349707  | 2.0 |        |     |  |  |
|                    | 4-Sep | NM_011129 | 2.0 |        |     |  |  |
| Ifi35              |       | AW986054  | 2.0 |        |     |  |  |
| Timp3              |       | BI111620  | 2.0 |        |     |  |  |
| Selp               |       | M72332    | 2.0 |        |     |  |  |
| Spink2             |       | BE456717  | 2.0 |        |     |  |  |
| Dock9              |       | AA410148  | 2.0 |        |     |  |  |
| Tnfaip8            |       | NM_134131 | 2.0 |        |     |  |  |
| Galnt12            |       | AV376137  | 2.0 |        |     |  |  |
| 2600010E01Rik      |       | AK011178  | 2.0 |        |     |  |  |
| Cda                |       | AK008793  | 2.0 |        |     |  |  |
| Als2cl             |       | BM201174  | 2.0 |        |     |  |  |
| Igfbp4             |       | BB787243  | 2.0 |        |     |  |  |
| 9030409G11Rik      |       | BQ175107  | 2.0 |        |     |  |  |
| Irf9               |       | NM_008394 | 2.0 |        |     |  |  |
| Sncg               |       | NM_011430 | 2.0 |        |     |  |  |
| Nrip3              |       | NM_020610 | 2.0 |        |     |  |  |
| Tppp3              |       | NM_026481 | 2.0 |        |     |  |  |
| Gzme               |       | NM_010373 | 2.0 |        |     |  |  |
| Acsl6              |       | BC022959  | 2.0 |        |     |  |  |
| Ndrg1              |       | NM_008681 | 2.0 |        |     |  |  |
| AW987390           |       | BB018051  | 1.9 |        |     |  |  |
| 100038993          | ///   | Il1ra1    | /// | Il1ra2 | /// |  |  |
| OTTMUSG00000011351 |       | BC004619  | 1.9 |        |     |  |  |
| Rtn2               |       | AF038538  | 1.9 |        |     |  |  |
| Dync1i1            |       | NM_010063 | 1.9 |        |     |  |  |
| Eif4e3             |       | BC027014  | 1.9 |        |     |  |  |
| Irf7               |       | NM_016850 | 1.9 |        |     |  |  |
| Fndc3c1            | ///   | LOC676436 | 1.9 |        |     |  |  |
| Pygl               |       | NM_133198 | 1.9 |        |     |  |  |

|                       |           |     |
|-----------------------|-----------|-----|
| Arvcf                 | BE947943  | 1.9 |
| Card10                | NM_130859 | 1.9 |
| Glt8d2                | AK003894  | 1.9 |
| Ddx58                 | BG063981  | 1.9 |
| Gpr123                | AU015577  | 1.9 |
| Sult4a1               | AV338618  | 1.9 |
| H2-M3                 | NM_013819 | 1.9 |
| Hrh1 /// LOC100041871 | BB051552  | 1.9 |
| Cxcr6                 | NM_030712 | 1.9 |
| Hs3st3b1              | BG918344  | 1.9 |
| Nap112                | NM_008671 | 1.9 |
| Lifr                  | AV246615  | 1.9 |
| Nfkbie                | BB820441  | 1.9 |
| Tnip1                 | AJ242777  | 1.9 |
| Aldh6a1               | NM_134042 | 1.9 |
| Cdk12                 | NM_016912 | 1.9 |
| Pmp22                 | NM_008885 | 1.9 |
| Slco2a1               | AI606070  | 1.9 |
| Pdlim4                | NM_019417 | 1.9 |
| Esrp2                 | BF124648  | 1.9 |
| Adcy7                 | NM_007406 | 1.9 |
| Plat                  | NM_008872 | 1.9 |
| Parp12                | BM227980  | 1.9 |
| Adam8                 | NM_007403 | 1.9 |
| 4930486L24Rik         | AK015635  | 1.9 |
| Galnt3                | AK019995  | 1.9 |
| Tspan9                | AK020159  | 1.9 |
| Bace2                 | BB558905  | 1.9 |
| Herc5                 | AW208668  | 1.9 |
| S100a13               | NM_009113 | 1.9 |
| Bat2d                 | BI083627  | 1.9 |
| Cxcr6                 | AF301018  | 1.9 |
| Tmem54                | BC019563  | 1.9 |
| Socs3                 | BB241535  | 1.9 |
| Serpinb9g             | AF425083  | 1.9 |
| Slc9a3r1              | BB805362  | 1.9 |
| Selp                  | BB224329  | 1.9 |
| Tmem51                | BC003277  | 1.9 |
| Trim54                | NM_021447 | 1.9 |
| Hint3                 | BM213104  | 1.9 |
| Slco1a5               | NM_130861 | 1.9 |
| Igfbp4                | BC019836  | 1.9 |
| Arrb1                 | AK004614  | 1.9 |



|                                                                                    |           |     |
|------------------------------------------------------------------------------------|-----------|-----|
| Epb4.115                                                                           | AW537770  | 1.9 |
| Tcp1112                                                                            | BM245221  | 1.9 |
| Xdh                                                                                | AV286265  | 1.9 |
| Cd274                                                                              | NM_021893 | 1.9 |
| B230311B06Rik                                                                      | BB309504  | 1.9 |
| Steap2                                                                             | BB817972  | 1.9 |
| Ildr2                                                                              | BG067625  | 1.9 |
| Radil                                                                              | BB521978  | 1.9 |
| C1r                                                                                | NM_023143 | 1.9 |
| Gbp6                                                                               | BC010229  | 1.9 |
| Arhgap18                                                                           | BB667215  | 1.9 |
| 100040462 /// Ifi203 /// Ifi204 /// Ifi205 /// LOC192690 ///<br>LOC640890 /// Mnda | AI481797  | 1.9 |
| Igfbp4                                                                             | NM_010517 | 1.9 |
| Aqp1                                                                               | NM_007472 | 1.9 |
| Ivl                                                                                | AV009441  | 1.8 |
| Upk1b                                                                              | BB219662  | 1.8 |
| Mtss1                                                                              | BC024131  | 1.8 |
| Aldh111 /// LOC100047937                                                           | AK007822  | 1.8 |
| Plcx1                                                                              | BB187908  | 1.8 |
| Eif4e                                                                              | BQ032226  | 1.8 |
| Apcdd1                                                                             | BB770932  | 1.8 |
| Llg12 /// LOC100047332                                                             | AY033650  | 1.8 |
| Cand2                                                                              | BM238658  | 1.8 |
| Slco2a1                                                                            | NM_033314 | 1.8 |
| Boc                                                                                | BB005556  | 1.8 |
| Stard5                                                                             | BI076697  | 1.8 |
| Mmp3                                                                               | NM_010809 | 1.8 |
| Spint2                                                                             | AV058358  | 1.8 |
| Fuca2                                                                              | BM054266  | 1.8 |
| Pdcd6ip                                                                            | BC026823  | 1.8 |
| Cib2                                                                               | NM_019686 | 1.8 |
| Fhod3                                                                              | BG066491  | 1.8 |
| Igf2                                                                               | NM_010514 | 1.8 |
| Serpini1                                                                           | NM_009250 | 1.8 |
| Hpse                                                                               | BG094050  | 1.8 |
| Nmi                                                                                | BC002019  | 1.8 |
| Pfkfb4                                                                             | BE136572  | 1.8 |
| Ablim1                                                                             | AK011936  | 1.8 |
| Ptplad2                                                                            | AV291250  | 1.8 |
| Itih5                                                                              | AV239969  | 1.8 |
| Fam117a                                                                            | AW548096  | 1.8 |
| Slc7a7                                                                             | NM_011405 | 1.8 |

|               |           |     |
|---------------|-----------|-----|
| Sfmbt2        | BM200222  | 1.8 |
| Krt20         | AF473907  | 1.8 |
| Yipf2         | AV166218  | 1.8 |
| Klc3          | BC017147  | 1.8 |
| Creg1         | BC027426  | 1.8 |
| Ttl17         | BB795572  | 1.8 |
| 0610010O12Rik | AK002512  | 1.8 |
| Pdlim2        | BC024556  | 1.8 |
| Prg4          | NM_021400 | 1.8 |
| Mbp           | BB181247  | 1.8 |
| AI256396      | BB328287  | 1.8 |
| Lhx6          | AB031040  | 1.8 |
| Ccl17         | NM_011332 | 1.8 |
| Mmp10         | NM_019471 | 1.8 |
| Phactr2       | BE631955  | 1.8 |
| Mest          | AW555393  | 1.8 |
| Scn3b         | BE951842  | 1.8 |
| Peg3          | AB003040  | 1.8 |
| Pla2g7        | AK005158  | 1.8 |
| Isyna1        | NM_023627 | 1.8 |
| Peg3          | AB003040  | 1.8 |
| S100a1        | AI266795  | 1.8 |
| Lynx1         | NM_011838 | 1.8 |
| Sfrp1         | BI658627  | 1.8 |
| Pdk1          | BB553369  | 1.8 |
| B4galt4       | AF158746  | 1.8 |
| 1600014C10Rik | AV341544  | 1.8 |
| Lrpap1        | D00622    | 1.8 |
| Tuft1         | NM_011656 | 1.8 |
| Hivep3        | BB164127  | 1.8 |
| Calml4        | AY061807  | 1.8 |
| 9230105E10Rik | BI653857  | 1.8 |
| Sord          | BI143942  | 1.8 |
| Gstm6         | NM_008184 | 1.8 |
| Svep1         | NM_022814 | 1.8 |
| Lynx1         | BB431070  | 1.8 |
| Rragd         | BF462770  | 1.8 |
| Ildr2         | AI852300  | 1.8 |
| Pla2g16       | BC024581  | 1.8 |
| Lor           | NM_008508 | 1.8 |
| Rgs4          | NM_009062 | 1.8 |
| Larp6         | NM_026235 | 1.8 |
| Ehd4          | NM_133838 | 1.8 |

|                                  |           |     |
|----------------------------------|-----------|-----|
| Rdh10                            | BG073496  | 1.8 |
| Bace2                            | BB348062  | 1.8 |
| Tm7sf2                           | BC014769  | 1.8 |
| Gjb4                             | NM_008127 | 1.8 |
| Ager                             | NM_007425 | 1.8 |
| Pla2g16                          | BB404920  | 1.8 |
| Smarca1                          | NM_053123 | 1.8 |
| Chic1                            | BG065782  | 1.8 |
| Socs3                            | BB831725  | 1.8 |
| Optn                             | BB770843  | 1.7 |
| Cxcl1                            | BB554288  | 1.7 |
| 2010012O05Rik                    | BB322051  | 1.7 |
| 0610037M15Rik                    | BG916808  | 1.7 |
| Selp                             | M72332    | 1.7 |
| Bnc1                             | U88064    | 1.7 |
| Dgat2                            | AK002443  | 1.7 |
| 1190003J15Rik                    | BI556771  | 1.7 |
| 1110008P14Rik                    | C79326    | 1.7 |
| 4930583H14Rik                    | NM_026358 | 1.7 |
| Dach2                            | NM_033605 | 1.7 |
| P2rx5                            | NM_033321 | 1.7 |
| Speg                             | NM_007463 | 1.7 |
| Steap2                           | BB529332  | 1.7 |
| Slc9a3r2                         | AV002797  | 1.7 |
| LOC100045567 /// Pnp1 /// Pnp2   | AK008143  | 1.7 |
| Vamp5                            | AK009266  | 1.7 |
| Rnasel                           | BF714880  | 1.7 |
| Cyld                             | AK013508  | 1.7 |
| Ccl20                            | AF099052  | 1.7 |
| Samd9l                           | BB145092  | 1.7 |
| Rom1                             | NM_009073 | 1.7 |
| Akr1c18                          | NM_134066 | 1.7 |
| Rasgrp3                          | BB042252  | 1.7 |
| Sema3e                           | AF034744  | 1.7 |
| LOC100045833 /// Ly6c1 /// Ly6c2 | NM_010741 | 1.7 |
| Acss2                            | NM_019811 | 1.7 |
| Hdac11                           | BC016208  | 1.7 |
| Sfrp1                            | AK008943  | 1.7 |
| Smarca2                          | BM230202  | 1.7 |
| Tbcel                            | BB540721  | 1.7 |
| Nnat                             | AV218841  | 1.7 |
| Abcb1a                           | M30697    | 1.7 |
| Chmp4c                           | AK008733  | 1.7 |

|                         |           |     |
|-------------------------|-----------|-----|
| Wnt4                    | AW047257  | 1.7 |
| Cdon                    | AW557006  | 1.7 |
| Cisd3                   | AV000569  | 1.7 |
| Flywch2                 | BB251185  | 1.7 |
| Car12                   | AK009873  | 1.7 |
| Fam134b                 | BC019494  | 1.7 |
| Rab3d                   | BB349707  | 1.7 |
| Clip4                   | AK017914  | 1.7 |
| Nipal2                  | BC016107  | 1.7 |
| Cxadr                   | BE824924  | 1.7 |
| Ube11                   | AK004894  | 1.7 |
| Pnkd                    | NM_019999 | 1.7 |
| Mmp19                   | AF153199  | 1.7 |
| Il13ra1                 | BI081033  | 1.7 |
| Akr1c12 /// Akr1c13     | AF177041  | 1.7 |
| BC029722                | AK009222  | 1.7 |
| Wfs1                    | NM_011716 | 1.7 |
| Entpd4 /// LOC100048085 | BB022415  | 1.7 |
| Rec8                    | NM_020002 | 1.7 |
| Arhgap28                | BB458819  | 1.7 |
| Glt8d2                  | AK003894  | 1.7 |
| Limch1                  | AV024662  | 1.7 |
| Ckb                     | BG967663  | 1.7 |
| Arhgef3                 | BC012262  | 1.7 |
| Abcg1                   | AW413978  | 1.7 |
| Npl                     | BC022734  | 1.7 |
| Pde2a                   | BG069616  | 1.7 |
| Atp8a1                  | AW610650  | 1.7 |
| H2-Ke6                  | AI323545  | 1.7 |
| Ctnnal1                 | BQ031240  | 1.7 |
| C1qtnf5 /// Mfrp        | BC023068  | 1.7 |
| Rasgrp3                 | BB042252  | 1.7 |
| Ppt1                    | AF326558  | 1.7 |
| Nlrc3                   | BB466171  | 1.7 |
| 100039707 /// Mthfs     | NM_026829 | 1.7 |
| Glt8d4 /// LOC100048436 | AV278332  | 1.7 |
| Nkd2                    | BC019952  | 1.7 |
| Nts                     | NM_024435 | 1.7 |
| Fam49a                  | AV228737  | 1.7 |
| Eif2ak2                 | AV328340  | 1.7 |
| 5730469M10Rik           | AK017688  | 1.7 |
| Acot11                  | AW060409  | 1.7 |
| Tnfrsf22 /// Tnfrsf23   | BB366863  | 1.7 |

|                       |           |           |     |
|-----------------------|-----------|-----------|-----|
| Snhg11                |           | BI731047  | 1.7 |
| Lgals9                |           | NM_010708 | 1.7 |
| Nudt22                |           | BC019768  | 1.7 |
| Tbc1d24               |           | AA270038  | 1.7 |
| Spr2a                 |           | AV371678  | 1.7 |
| Ch25h                 |           | NM_009890 | 1.7 |
| Hsd3b7                |           | NM_133943 | 1.7 |
| Pgf                   |           | NM_008827 | 1.7 |
| Sh3bgrl2              |           | BB352548  | 1.7 |
| 8430427H17Rik         |           | AK018446  | 1.7 |
| Ppbp                  |           | NM_023785 | 1.7 |
| Afap112               |           | BG068103  | 1.7 |
| Fhit                  |           | AF055573  | 1.7 |
| Ptges                 |           | BB730139  | 1.7 |
| Tmem106a              |           | AV024335  | 1.7 |
| Znrf2                 |           | BG071922  | 1.7 |
| Sft2d2                |           | AV238378  | 1.7 |
| LOC100045567 /// Pnp1 |           | BC003788  | 1.7 |
| Speer3                |           | NM_027650 | 1.7 |
| Ddc                   |           | AF071068  | 1.7 |
| Scrn1                 |           | BF466917  | 1.7 |
| Epas1                 |           | BI647951  | 1.7 |
|                       | 100042616 | BI133445  | 1.7 |
| S100a3                |           | AF087470  | 1.7 |
| Pld1                  |           | BM228590  | 1.7 |
| Fstl3                 |           | NM_031380 | 1.7 |
|                       | 6-Sep     | BG920446  | 1.6 |
| Myo7a                 |           | NM_008663 | 1.6 |
| Maff                  |           | BC022952  | 1.6 |
| 9530028C05            |           | BQ175154  | 1.6 |
| F630110N24Rik         |           | AV307274  | 1.6 |
| Tapbp                 |           | AF043943  | 1.6 |
| Fam134b               |           | NM_025459 | 1.6 |
| Kifc3                 |           | NM_010631 | 1.6 |
| H2-D1                 |           | M34962    | 1.6 |
| H2-D1                 |           | M86502    | 1.6 |
| Saa3                  |           | NM_011315 | 1.6 |
| Tmem106a              |           | BC022145  | 1.6 |
| Calr3                 |           | AI324734  | 1.6 |
| Tmem176a              |           | BC006049  | 1.6 |
| Ccl2                  |           | AF065933  | 1.6 |
| Casp12                |           | NM_009808 | 1.6 |
| Upk1b                 |           | BB530943  | 1.6 |

|                         |           |     |
|-------------------------|-----------|-----|
| Tmem8                   | NM_021793 | 1.6 |
| Zbp1                    | AK008179  | 1.6 |
| Rnf213                  | AW556558  | 1.6 |
| Wnt9a                   | AV273409  | 1.6 |
| Herc1                   | BM247513  | 1.6 |
| Aifm2                   | AK017403  | 1.6 |
| Mitf                    | BB763517  | 1.6 |
| C77080                  | BB163333  | 1.6 |
| Il13ra1                 | BB730912  | 1.6 |
| Hdac5                   | NM_010412 | 1.6 |
| Nebl                    | BM121794  | 1.6 |
| Nmb                     | NM_026523 | 1.6 |
| Gja3                    | BM125285  | 1.6 |
| Has2                    | NM_008216 | 1.6 |
| Ube2l6                  | BC008238  | 1.6 |
| Rasgrp2                 | BE688720  | 1.6 |
| Ninj1                   | NM_013610 | 1.6 |
| Apoe                    | AK019319  | 1.6 |
| Mvp                     | NM_080638 | 1.6 |
| Plek2                   | NM_013738 | 1.6 |
| Smpd3                   | BF456582  | 1.6 |
| Casp4                   | NM_007609 | 1.6 |
| LOC552880               | BB028429  | 1.6 |
| Reck                    | NM_016678 | 1.6 |
| Nudt22                  | BC019768  | 1.6 |
| Ccl9                    | AF128196  | 1.6 |
| Trp53inp2               | AK003956  | 1.6 |
| Eif2ak2                 | BE911144  | 1.6 |
| 2310030G06Rik           | NM_025865 | 1.6 |
| Creg1                   | BC027426  | 1.6 |
| Kif5c                   | BB698320  | 1.6 |
| C1s /// LOC100044326    | BC022123  | 1.6 |
| Aoc3                    | NM_009675 | 1.6 |
| Lgals3                  | X16834    | 1.6 |
| Mtm1                    | NM_019926 | 1.6 |
| 8430427H17Rik           | AK018446  | 1.6 |
| Rnf207                  | BI734893  | 1.6 |
| D330022A01Rik /// Ube1l | AK004894  | 1.6 |
| Trf                     | AF440692  | 1.6 |
| As3mt                   | AK009814  | 1.6 |
| Rrm2b                   | BB702377  | 1.6 |
| Ap3m2                   | BC027301  | 1.6 |
| Sned1                   | BB487754  | 1.6 |

|                                        |           |     |
|----------------------------------------|-----------|-----|
| Cxcl16                                 | BC019961  | 1.6 |
| Cd9912                                 | BB334959  | 1.6 |
| Optn                                   | AK015354  | 1.6 |
| H2-D1                                  | L36068    | 1.6 |
| Rassf7                                 | NM_025886 | 1.6 |
| Mfsd6                                  | BF225441  | 1.6 |
| Gstm2                                  | NM_008183 | 1.6 |
| Ninj1                                  | AU024536  | 1.6 |
| 6330512M04Rik                          | BM116861  | 1.6 |
| Serpinb8                               | BB049357  | 1.6 |
| Steap2                                 | BE995447  | 1.6 |
| Tinagl1                                | BC005738  | 1.6 |
| Mpp7                                   | AK012883  | 1.6 |
| C920025E04Rik /// H2-T23               | NM_010398 | 1.6 |
| Tbc1d24                                | BF536757  | 1.6 |
| Speg                                   | NM_007463 | 1.6 |
| Syt14                                  | NM_013757 | 1.6 |
| 1110008P14Rik                          | BC024615  | 1.6 |
| Htra3                                  | NM_030127 | 1.6 |
| Adamts4                                | BG064671  | 1.6 |
| Sgcb                                   | AK014381  | 1.6 |
| Usp2                                   | AI553394  | 1.6 |
| Dmxl2                                  | AK018275  | 1.6 |
| 4632428N05Rik                          | BC003967  | 1.6 |
| Enpp4                                  | BG920295  | 1.6 |
| Olfml3                                 | NM_133859 | 1.6 |
| Ndr1                                   | AI987929  | 1.6 |
| Hsd12                                  | BM200015  | 1.6 |
| Mansc1                                 | AK002644  | 1.6 |
| Brp44l                                 | AV223468  | 1.6 |
| Cd9912                                 | BB038546  | 1.6 |
| Hspa12a                                | BQ177161  | 1.6 |
| H2-T10 /// H2-T17 /// H2-T22 /// H2-T9 | NM_010395 | 1.6 |
| Arvcf                                  | BE947943  | 1.6 |
| Naprt1                                 | AI174034  | 1.6 |
| LOC100034363 /// Tmsb15b1-Tmsb15b2     | AW912417  | 1.6 |
| Acaa1b                                 | BC019882  | 1.6 |
| Parp4                                  | BB552308  | 1.6 |
| Atp9a                                  | AF011336  | 1.6 |
| Shroom3                                | NM_015756 | 1.6 |
| Stard10                                | NM_019990 | 1.6 |
| Tnfrsf11                               | NM_011613 | 1.6 |
| Cnp                                    | BB251922  | 1.6 |

|                           |           |     |
|---------------------------|-----------|-----|
| Il13ra1                   | BB730912  | 1.6 |
| Stard8                    | BM119481  | 1.6 |
| Xkr8                      | AV273072  | 1.6 |
| Cd40                      | NM_011611 | 1.6 |
| Elov14                    | BB829575  | 1.6 |
| Acss2                     | NM_019811 | 1.6 |
| Ndrp2                     | NM_013864 | 1.6 |
| Stx11                     | BB767243  | 1.6 |
| Ppp2r2c                   | AV223153  | 1.6 |
| Sdsl                      | NM_133902 | 1.6 |
| Ptprg                     | AK017277  | 1.6 |
| Dusp2                     | L11330    | 1.6 |
| Slc9a3r1                  | BG066200  | 1.6 |
| Il13ra1                   | S80963    | 1.6 |
| Serping1                  | NM_009776 | 1.6 |
| Obfc2a                    | BE457727  | 1.6 |
| Ppfia3                    | BG962793  | 1.6 |
| Cxcl2                     | NM_009140 | 1.6 |
| Zfp672                    | BC003258  | 1.6 |
| Chst11                    | AK003880  | 1.6 |
| Rbp1                      | NM_011254 | 1.6 |
| Kcnmb1                    | BB633976  | 1.6 |
| Tgfbi                     | BB532080  | 1.6 |
| Dner                      | BB038556  | 1.6 |
| Mgat4a                    | BB109391  | 1.6 |
| Mfsd9                     | AU067683  | 1.6 |
| Camk1                     | NM_133926 | 1.6 |
| Morn4                     | BF464669  | 1.6 |
| OTTMUSG00000016644        | BM245961  | 1.6 |
| Dlk1                      | NM_010052 | 1.6 |
| Adcy9                     | AW125421  | 1.6 |
| Kif21a                    | NM_016705 | 1.6 |
| Nudt11                    | BQ174833  | 1.6 |
| Taf7                      | AV213552  | 1.6 |
| Ccpg1                     | BC006717  | 1.6 |
| Fcgrt                     | NM_010189 | 1.6 |
| Nol3                      | BC027290  | 1.6 |
| Erap1                     | NM_030711 | 1.6 |
| Shroom2                   | BQ176992  | 1.6 |
| Cyld                      | BM119209  | 1.6 |
| Dync2li1 /// LOC100048514 | AK008822  | 1.6 |
| Fam69b                    | NM_019833 | 1.6 |
| H2-L                      | M69068    | 1.6 |



|                       |           |     |
|-----------------------|-----------|-----|
| Ccl7                  | AF128193  | 1.6 |
| Endod1                | BF168366  | 1.6 |
| Ifi2712b              | BC021795  | 1.6 |
| Gpr116                | AW547876  | 1.6 |
| Pdzd2                 | AV376136  | 1.6 |
| Golm1                 | BC011152  | 1.6 |
| Aifm2                 | AK017403  | 1.6 |
| Cpeb4                 | NM_026252 | 1.6 |
| Cgnl1                 | BB409331  | 1.6 |
| Casp12                | NM_009808 | 1.6 |
| 5730469M10Rik         | AV332575  | 1.6 |
| Tgfbi                 | BB533460  | 1.6 |
| Gm2a                  | BC004651  | 1.6 |
| Sod3                  | NM_011435 | 1.6 |
| Hfe                   | AJ306425  | 1.6 |
| Aqp5 /// LOC100046616 | NM_009701 | 1.6 |
| Cyp27a1               | NM_024264 | 1.6 |
| A930005H10Rik         | AV009179  | 1.6 |
| Csf3                  | NM_009971 | 1.5 |
| Herc3                 | BM239854  | 1.5 |
| Tlr3                  | NM_126166 | 1.5 |
| Mtap7                 | NM_008635 | 1.5 |
| Tgfbi                 | NM_009369 | 1.5 |
| Mkrn1                 | BC003329  | 1.5 |
| Cd40                  | BB220422  | 1.5 |
| Ostm1                 | AK004546  | 1.5 |
| Cotl1                 | BB160417  | 1.5 |
| Tmem154               | BB778966  | 1.5 |
| ENSMUSG00000073019    | BB349472  | 1.5 |
| Nudt14                | BC025444  | 1.5 |
| Slc2a13               | BB191000  | 1.5 |
| 0610040B09Rik         | AV302770  | 1.5 |
| Napepld               | BB325565  | 1.5 |
| Ficd                  | C77487    | 1.5 |
| Bicd1                 | BB130665  | 1.5 |
| Bscl2                 | BB223872  | 1.5 |
| BC023969              | BI664409  | 1.5 |
| Pion                  | BB820613  | 1.5 |
| 1810012P15Rik         | AW108427  | 1.5 |
| Ikbke                 | NM_019777 | 1.5 |
| Scube3                | BB484128  | 1.5 |
| Tspan13               | BB807707  | 1.5 |
| Kif21a                | BB342219  | 1.5 |

|                       |           |     |
|-----------------------|-----------|-----|
| LOC545261             | AI429562  | 1.5 |
| Chmp2a                | BC012230  | 1.5 |
| Timp3                 | BI111620  | 1.5 |
| Pcyox1                | BB041555  | 1.5 |
| Klhl29                | BI988550  | 1.5 |
| Phactr2               | BB321846  | 1.5 |
| 6330416G13Rik         | AV326978  | 1.5 |
| Tmem141               | AW551717  | 1.5 |
| 5133401N09Rik         | BC026742  | 1.5 |
| Nlrx1                 | BB830346  | 1.5 |
| Pgcp                  | BB468025  | 1.5 |
| Lrpap1                | D00622    | 1.5 |
| Commd9                | AK007640  | 1.5 |
| Insl6                 | NM_013754 | 1.5 |
| Gpm6b                 | AK016567  | 1.5 |
| St14                  | NM_011176 | 1.5 |
| 1810020D17Rik         | BC026557  | 1.5 |
| Arrdc4                | BC025091  | 1.5 |
| Fbxo6                 | NM_015797 | 1.5 |
| Tst                   | BC005644  | 1.5 |
| Ninj1                 | BB252065  | 1.5 |
| Ank2                  | BQ174638  | 1.5 |
| Sbsn                  | AI507307  | 1.5 |
| Cd40                  | AI385482  | 1.5 |
| Acat1                 | BG070487  | 1.5 |
| Cyb561d2              | NM_019720 | 1.5 |
| Rab3d                 | BB349707  | 1.5 |
| Plekha2               | BE852755  | 1.5 |
| Kif21b                | AV122249  | 1.5 |
| Vav3                  | BC027242  | 1.5 |
| Aifm2                 | BB772185  | 1.5 |
| Prkcz                 | NM_008860 | 1.5 |
| Plekhh2               | AW122265  | 1.5 |
| Tmem38b               | BC011072  | 1.5 |
| Ctf1                  | NM_007795 | 1.5 |
| Entpd5                | NM_007647 | 1.5 |
| Hagh                  | BC004749  | 1.5 |
| Fam73a                | BB375245  | 1.5 |
| Rnaset2a /// Rnaset2b | BI410170  | 1.5 |
| Prlr                  | AW554594  | 1.5 |
| Lrpap1                | AV309553  | 1.5 |
| 2610318N02Rik         | AK012048  | 1.5 |
| Adar                  | AF291876  | 1.5 |

|                       |           |     |
|-----------------------|-----------|-----|
| Ppfibp2               | NM_008905 | 1.5 |
| Adcy7                 | BB746807  | 1.5 |
| Sub1                  | BE989104  | 1.5 |
| Nme3                  | NM_019730 | 1.5 |
| S100a16               | AV074236  | 1.5 |
| Adamts11              | AV380797  | 1.5 |
| Sema3e                | NM_011348 | 1.5 |
| Bcl2l11               | BM120925  | 1.5 |
| Bsc12                 | AF069954  | 1.5 |
| Adcy9                 | AW125421  | 1.5 |
| Hagh                  | BC004749  | 1.5 |
| Clybl                 | BC023398  | 1.5 |
| U90926                | NM_020562 | 1.5 |
| Adar                  | BB308291  | 1.5 |
| Dgat2                 | AK002443  | 1.5 |
| Fars2                 | BB530332  | 1.5 |
| Depdc6                | AK014624  | 1.5 |
| 9030409G11Rik         | AK018497  | 1.5 |
| ENSMUSG00000071543    | BB321858  | 1.5 |
| Casc4                 | AV311104  | 1.5 |
| Galnt10               | BG965198  | 1.5 |
| 6530401D17Rik         | BC016270  | 1.5 |
| Ap1gbp1               | C76297    | 1.5 |
| Hspa12a               | BB197697  | 1.5 |
| Mitd1                 | BC020137  | 1.5 |
| Slfn10                | BB227643  | 1.5 |
| Ifi203                | M74124    | 1.5 |
| Gpr123                | BI135044  | 1.5 |
| Sesn3                 | NM_030261 | 1.5 |
| D16H22S680E           | NM_138583 | 1.5 |
| Gmpr /// LOC100045393 | NM_025508 | 1.5 |
| Ncoa7                 | BE686893  | 1.5 |
| Slc2a9                | BB148652  | 1.5 |
| Clcn3                 | BI739053  | 1.5 |
| ---                   | BI150812  | 1.5 |
| Endod1                | BF168366  | 1.5 |
| Igf1                  | BG075165  | 1.5 |
| Cdk2ap2               | NM_026373 | 1.5 |
| Stx11                 | AK017897  | 1.5 |
| A830007P12Rik         | BC013092  | 1.5 |
| Cpeb3                 | BB281000  | 1.5 |
| Vdr                   | AV290079  | 1.5 |
| 1110003E01Rik         | BB701294  | 1.5 |

|               |           |     |
|---------------|-----------|-----|
| Tln2          | BQ174291  | 1.5 |
| Psph          | NM_133900 | 1.5 |
| Bckdhh        | AW047304  | 1.5 |
| Mreg          | AV298358  | 1.5 |
| Ifi2711       | AW554405  | 1.5 |
| A530017D24Rik | BQ174983  | 1.5 |
| Ifitm1        | BC027285  | 1.5 |
| Nudt17        | AK019109  | 1.5 |
| Syt11         | BF457392  | 1.5 |
| Tmem38b       | C77858    | 1.5 |
| Kif5c         | AI844677  | 1.5 |
| Usp20         | AK006800  | 1.5 |
| Lipa          | AI596237  | 1.5 |
| Ids           | BB493523  | 1.5 |
| Aadacl1       | AV369935  | 1.5 |
| Enpp4         | AV280361  | 1.5 |
| Tnfrsf18      | AF229434  | 1.5 |
| Tmem173       | AV300716  | 1.5 |
| S100a1        | BC005590  | 1.5 |
| Fkbp11        | NM_024169 | 1.5 |
| Zfyve27       | BB780581  | 1.5 |
| Rab20         | BG066967  | 1.5 |
| Vgf           | BF458396  | 1.5 |
| Pdxk          | BG063905  | 1.5 |
| Fam122b       | AK019480  | 1.5 |
| Lipa          | AI596237  | 1.5 |
| 2900026A02Rik | BG063749  | 1.5 |
| Camk2n2       | AK013788  | 1.5 |
| Pcbd1         | NM_025273 | 1.5 |
| Mtss1         | AV024771  | 1.5 |
| Enpp5         | BC011294  | 1.5 |
| Rsph1         | NM_025290 | 1.5 |
| H6pd          | BC027358  | 1.5 |
| Wrn           | D86527    | 1.5 |
| Efna1         | D38146    | 1.5 |
| Rap1gap       | AK005063  | 1.5 |
| Entpd5        | NM_007647 | 1.5 |
| Akr1c13       | NM_013778 | 1.5 |
| Pilrb1        | NM_133209 | 1.5 |
| 1190003J15Rik | AK013117  | 1.5 |
| Ccdc23        | BC002274  | 1.5 |
| 2010107G23Rik | BC024943  | 1.5 |
| Dhrs11        | BC022224  | 1.5 |

|                       |           |     |
|-----------------------|-----------|-----|
| Prickle2              | BQ177191  | 1.5 |
| Mfsd8                 | AV024565  | 1.5 |
| Lrpap1                | D00622    | 1.5 |
| 2610110G12Rik         | AK011838  | 1.5 |
| Gpsm3                 | NM_134116 | 1.5 |
| Cacng8                | BQ266161  | 1.5 |
| Tmem40                | BB468188  | 1.5 |
| Tgoln1                | AI314055  | 1.5 |
| Tmem42                | NM_025339 | 1.5 |
| Asah2                 | NM_018830 | 1.5 |
| Madd                  | BM225074  | 1.5 |
| Smpdl3a               | NM_020561 | 1.5 |
| 9130213B05Rik         | BC006604  | 1.5 |
| Ccdc74a               | BG068839  | 1.5 |
| Ddb2                  | AY027937  | 1.5 |
| Trpv2                 | NM_011706 | 1.5 |
| Synpo                 | BB426294  | 1.5 |
| Ereg                  | NM_007950 | 1.5 |
| Slco2a1               | NM_033314 | 1.5 |
| Aadacl1               | AV369935  | 1.5 |
| Trim25                | D63902    | 1.5 |
| Gdap1                 | AU017649  | 1.5 |
| Higd1a                | NM_019814 | 1.5 |
| Kidins220             | BB430142  | 1.5 |
| Actn3                 | NM_013456 | 1.5 |
| Mpg                   | AV131794  | 1.5 |
| Gcnt2                 | AB037596  | 1.5 |
| Pcyox1                | BB785407  | 1.5 |
| Irak3                 | AV228493  | 1.5 |
| Amot                  | BG067039  | 1.5 |
| Maob                  | BB549292  | 1.5 |
| H2-D1                 | M33151    | 1.5 |
| Prss22                | NM_133731 | 1.5 |
| Pfkfb2                | AV256368  | 1.5 |
| Paqr7                 | BC022922  | 1.5 |
| Slfn8                 | BC024709  | 1.5 |
| Ahcyl2                | BG072404  | 1.5 |
| Ern1                  | BG075179  | 1.5 |
| Dtd1 /// LOC100048650 | AI451865  | 1.5 |
| Pon3                  | NM_008897 | 1.5 |
| Slc41a3               | BC011108  | 1.5 |
| Cdadcl                | BE200391  | 1.5 |
| Tmem141               | AW551717  | 1.5 |

|                           |           |     |
|---------------------------|-----------|-----|
| Aldh5a1                   | BQ175320  | 1.5 |
| Klc4                      | NM_029091 | 1.5 |
| Ubxn2b                    | NM_026534 | 1.5 |
| 1110031I02Rik             | NM_025402 | 1.5 |
| Fkbp1b                    | NM_016863 | 1.5 |
| Il13ra2                   | BC003723  | 1.5 |
| Mkrl1                     | BE133749  | 1.5 |
| Shb                       | BI408715  | 1.5 |
| Abca3                     | AK007703  | 1.5 |
| Pdk4                      | NM_013743 | 1.5 |
| Syt11                     | BC025207  | 1.5 |
| Dclk1                     | AW105916  | 1.5 |
| Usp11                     | AI117611  | 1.5 |
| Cacna1a                   | AB066608  | 1.5 |
| Mpp5                      | AW258373  | 1.5 |
| Psmb10                    | NM_013640 | 1.5 |
| Rab15                     | NM_134050 | 1.5 |
| Sgcb                      | AK014381  | 1.5 |
| Mpzl3                     | BM246392  | 1.5 |
| Ldhd                      | AV219418  | 1.5 |
| Prkar1b                   | BB274009  | 1.5 |
| Itga3                     | NM_013565 | 1.5 |
| Fst                       | NM_008046 | 1.5 |
| Ube2z                     | BB032870  | 1.5 |
| A230050P20Rik             | BB085904  | 1.5 |
| Rnaset2a /// Rnaset2b     | AV101824  | 1.5 |
| Sf3b5                     | AU043053  | 1.5 |
| Ebpl                      | BC027422  | 1.5 |
| Cotl1                     | AI327078  | 1.5 |
| Rhbdf2                    | BB005249  | 1.5 |
| Commd9                    | BB264843  | 1.5 |
| Spata13                   | AV271736  | 1.5 |
| Gpc4                      | BB530689  | 1.5 |
| Nsf                       | BB400581  | 1.5 |
| 9530058B02Rik             | NM_026633 | 1.5 |
| A930005H10Rik             | BF318375  | 1.5 |
| Fam105a                   | BM224662  | 1.5 |
| Psmf1                     | BC012260  | 1.5 |
| Ppp1r3c                   | BQ176864  | 1.5 |
| Gmms                      | AI747296  | 1.5 |
| Vav3                      | BC027242  | 1.5 |
| Xlr3a /// Xlr3b /// Xlr3c | NM_011726 | 1.5 |
| Ralgs2                    | AK008856  | 1.5 |

|               |           |     |
|---------------|-----------|-----|
| LOC100047530  | BI735554  | 1.5 |
| Igfbp6        | NM_008344 | 1.5 |
| Fdx1          | D43690    | 1.5 |
| Chchd6        | BC011331  | 1.5 |
| Fads3         | BM235658  | 1.5 |
| Gdf10         | L42114    | 1.5 |
| Tdrd7         | BC025099  | 1.5 |
| Fam102a       | BC023470  | 1.5 |
| Nudt6         | BB043522  | 1.5 |
| Stap2         | BC026642  | 1.5 |
| D730040F13Rik | AF031164  | 1.5 |
| 4933428G20Rik | BE988299  | 1.5 |
| Aldoc         | BC008184  | 1.5 |
| Mmp23         | NM_011985 | 1.5 |
| Mkrl1         | BQ176661  | 1.5 |
| Retsat        | BB775176  | 1.5 |

**Supplementary Table S2: Top Biological Functions affected in Ada3 cells as obtained from ingenuity pathway analysis**

| <b>Name</b>                                          | <b>p-value</b>      | <b># Molecules</b> |
|------------------------------------------------------|---------------------|--------------------|
| <b>Diseases and Disorders</b>                        |                     |                    |
| Cancer                                               | 7.02E-27 - 4.66E-04 | 445                |
| Dermatological Diseases and Conditions               | 2.53E-18 - 3.89E-04 | 105                |
| Genetic Disorder                                     | 2.53E-18 - 4.66E-04 | 330                |
| Gastrointestinal Disease                             | 5.58E-18 - 4.66E-04 | 211                |
| Inflammatory Response                                | 7.65E-18 - 4.41E-04 | 222                |
| <b>Molecular and Cellular Functions</b>              |                     |                    |
| Cell Death                                           | 1.76E-21 - 4.02E-04 | 359                |
| Cellular Growth and Proliferation                    | 1.40E-16 - 4.66E-04 | 389                |
| Cellular Movement                                    | 2.48E-16 - 4.41E-04 | 229                |
| Cellular Assembly and Organization                   | 3.71E-11 - 4.27E-04 | 188                |
| Cellular Function and Maintenance                    | 3.71E-11 - 4.13E-04 | 174                |
| <b>Physiological System Development and Function</b> |                     |                    |
| Tissue Development                                   | 9.91E-16 - 4.27E-04 | 330                |
| Organismal Survival                                  | 1.34E-12 - 5.77E-05 | 211                |
| Hematological System Development and Function        | 2.69E-12 - 4.66E-04 | 224                |
| Immune Cell Trafficking                              | 2.69E-12 - 4.41E-04 | 120                |
| Cardiovascular System Development and Function       | 3.03E-12 - 2.93E-04 | 144                |



**Supplementary Table S3: Primers used for Real Time-qPCR**

| Oligo Name       | Sequence 5' to 3'                |
|------------------|----------------------------------|
| p27 F            | CAGAATCATAAGCCCCTGGA             |
| p27 R            | GGGGAACCGTCTGAAACATT             |
| Skp2 F           | TCCGAGCTGATCGGGTGTGCT            |
| Skp2 R           | TCGGAAGCTGCACATGCGCA             |
| c-myc F          | TGACCTAACTCGAGGAGGAGCTGGAATC     |
| c-myc R          | AAGTTTGAGGCAGTTAAAATTATGGCTGAAGC |
| $\beta$ -actin F | GCGGACTGTTACTGAGCTGCGT           |
| $\beta$ -actin R | TGCTGTGCGCTTCACCGTTCC            |
| Fbxo5 F          | GGCACAATGAGTTCGTGGAGGTGG         |
| Fbxo5 R          | AGTTCCAGGCAAAGGACCCACT           |
| Cenpf F          | GTGGCAGCAGATCACAAAAGGTCA         |
| Cenpf R          | TCCCCACAGGCAGGCTCCTT             |
| Cdc6 F           | TGCCCAAAGAGGAGCGGCCT             |
| Cdc6 R           | AGAGGGGAAGGAACTTGGCCCC           |
| Kntc1 F          | CCCCTCAACGGTGCCAGTG              |
| Kntc1 R          | GGCGCATGCCAGTGTACTTGT            |
| Kif11 F          | CCAGCAAGGAGACCAGTCAGGACA         |
| Kif11 R          | TGGAGGTGTGAAGCGGCAGT             |
| Cyclin A2 F      | GAGCTGGCCTGAGTCATTGGCA           |
| Cyclin A2 R      | TGTTGGGCATGTTGTGGCGCT            |
| Smc2 F           | GGTGGTCAGAGGTCTCTAGTGGCT         |
| Smc2 R           | TCTTCCCAGCTTGACTCTGCGT           |
| Anillin F        | TGCCTGGCACCGAAGATGGTG            |
| Anillin R        | TGCAGAGAGCCAGTTCTTGGTGA          |
| Cdkn1c-F         | ACTGCTGCGGCCAATGCGAA             |
| Cdkn1c-R         | TGGGCTGCTCTACGCAACCATCT          |
| Foxg1-F          | TTCTAACACGGTGTGGAGTGTC           |
| Foxg1-F          | TTGTCAGGTTTGAATGAAATGG           |
| Cyclin E2 F      | AGGAATCAGCCCTTGCAATTATC          |
| Cyclin E2 R      | CCCAGCTTAAATCTGGCAGAG            |
| Keratin 18 F     | CAAGTCTGCCGAAATCAGGGAC           |
| Keratin 18 R     | TCCAAGTTGATGTTCTGGTTTT           |
| Icam1 F          | TGTCAGCCACTGCCTTGGTA             |
| Icam1 R          | CAGGATCTGGTCCGCTAGCT             |

---

Interleukin-6 F

CACAGAGGATACCACTCCCAACA

Interleukin-6 R

TCCACGATTGCCAGAGAACA

---

### SUPPLEMENTARY REFERENCES

1. Liu, P., Jenkins, N. A., and Copeland, N. G. (2003) *Genome Res* **13**, 476-484
2. Zhao, X., Malhotra, G. K., Lele, S. M., Lele, M. S., West, W. W., Eudy, J. D., Band, H., and Band, V. *Proc Natl Acad Sci U S A* **107**, 14146-14151
